# Supplementary material for: Gene Co-Expression Network Analysis Reveals the Hub Genes and Key Pathways Associated with Resistance to Salmonella Enteritidis Colonization in Chicken
Source: Int J Mol Sci. 2023 Mar 2;24(5):4824. doi: 10.3390/ijms24054824 (PMC10003191; doi:10.3390/ijms24054824)
Supplement: Supplementary file 1 [file ijms-24-04824-s001.zip]

Archive with 8 entries (8 files):
- ijms-2061148-supplementary figures.pdf
- Supplementary Table S1.xlsx
- Supplementary Table S2.xlsx
- Supplementary Table S3.xlsx
- Supplementary Table S4.xlsx
- Supplementary Table S5.xlsx
- Supplementary Table S6.xlsx
- Supplementary Table S7.xlsx
