# Supplementary material for: Gene Co-Expression Network Analysis Reveals the Hub Genes and Key Pathways Associated with Resistance to Salmonella Enteritidis Colonization in Chicken
Source: Int J Mol Sci. 2023 Mar 2;24(5):4824. doi: 10.3390/ijms24054824 (PMC10003191; doi:10.3390/ijms24054824)
Supplement: Supplementary file 1 [file ijms-24-04824-s001.zip › Supplementary Table S1.xlsx]

## Sheet: Sheet1
Supplementary Table S1. Summary statistics of the RNA-seq data.
H/L ratio	Day post-infection	Raw Reads	Clean Reads	Mapped Reads	Mapping Rate (%)
High	7	42822582	41432328	38175401	92.15
	21	42255231	41022718	38142557	92.96
Low	7	44363276	42862317	39328860	91.76
	21	42052928	40889878	37911696	92.72
