# Supplementary material for: Gene Co-Expression Network Analysis Reveals the Hub Genes and Key Pathways Associated with Resistance to Salmonella Enteritidis Colonization in Chicken
Source: Int J Mol Sci. 2023 Mar 2;24(5):4824. doi: 10.3390/ijms24054824 (PMC10003191; doi:10.3390/ijms24054824)
Supplement: Supplementary file 1 [file ijms-24-04824-s001.zip › Supplementary Table S2.xlsx]

## Sheet: Sheet1
GO		ONTOLOGY	ID	Description	GeneRatio	BgRatio	pvalue	p.adjust	qvalue	geneID	Count
H7 vs L7	GO:0004497	MF	GO:0004497	monooxygenase activity	44639	16/1927	0.000420119	0.0504143	0.0482032	CYP1A1/CYP26A1/CYP2C23a	3
	GO:0005506	MF	GO:0005506	iron ion binding	44639	25/1927	0.00163103	0.0547194	0.0523195	CYP1A1/CYP26A1/CYP2C23a	3
	GO:0020037	MF	GO:0020037	heme binding	44639	26/1927	0.00183228	0.0547194	0.0523195	CYP1A1/CYP26A1/CYP2C23a	3
	GO:0016705	MF	GO:0016705	oxidoreductase activity, acting on paired donors, with incorporation or reduction of molecular oxygen	44639	27/1927	0.00204846	0.0547194	0.0523195	CYP1A1/CYP26A1/CYP2C23a	3
	GO:0046906	MF	GO:0046906	tetrapyrrole binding	44639	28/1927	0.00227998	0.0547194	0.0523195	CYP1A1/CYP26A1/CYP2C23a	3
H21 vs L21	GO:0042254	BP	GO:0042254	ribosome biogenesis	10/104	36/2090	5.19289e-06	0.00623147	0.00623147	RPL26L1/RPL7A/RPL5/C1D/PAK1IP1/UTP15/GTF2H5/RPS15/RPL7/MTERF3	10
	GO:0006364	BP	GO:0006364	rRNA processing	7/104	19/2090	1.90044e-05	0.0112201	0.0112201	RPL7A/RPL5/C1D/UTP15/GTF2H5/RPS15/RPL7	7
	GO:0016072	BP	GO:0016072	rRNA metabolic process	7/104	20/2090	2.80503e-05	0.0112201	0.0112201	RPL7A/RPL5/C1D/UTP15/GTF2H5/RPS15/RPL7	7
	GO:0042273	BP	GO:0042273	ribosomal large subunit biogenesis	5/104	69703	0.000100877	0.0302631	0.0302631	RPL26L1/RPL7A/RPL5/PAK1IP1/RPL7	5
	GO:0005840	CC	GO:0005840	ribosome	10/109	35/2158	4.53897e-06	0.00052933	0.000527233	RPL26L1/RPL7A/RPL5/RPL13/RPS6/RPS15/MRPL50/RPL30/HSPA14/RPL7	10
	GO:0044391	CC	GO:0044391	ribosomal subunit	9/109	29/2158	6.59958e-06	0.00052933	0.000527233	RPL26L1/RPL7A/RPL5/RPL13/RPS6/RPS15/MRPL50/RPL30/RPL7	9
	GO:0022626	CC	GO:0022626	cytosolic ribosome	8/109	23/2158	8.53758e-06	0.00052933	0.000527233	RPL26L1/RPL7A/RPL5/RPL13/RPS6/RPS15/RPL30/RPL7	8
	GO:0015934	CC	GO:0015934	large ribosomal subunit	7/109	18/2158	1.39021e-05	0.00064645	0.000643889	RPL26L1/RPL7A/RPL5/RPL13/MRPL50/RPL30/RPL7	7
	GO:0022625	CC	GO:0022625	cytosolic large ribosomal subunit	6/109	14/2158	3.12429e-05	0.00116224	0.00115763	RPL26L1/RPL7A/RPL5/RPL13/RPL30/RPL7	6
H7 vs H21	GO:0006955	BP	GO:0006955	immune response	16/82	140/2090	6.34757e-05	0.0492761	0.0420989	B2M/IRF1/IFNG/IRF7/AvBD10/NTN1/S100A12/IL8L2/RSFR/CATHB1/CSF3/LOC395551/NOS2/TMEM173/BF2/EXFABP	16
	GO:0002376	BP	GO:0002376	immune system process	20/82	218/2090	0.000166694	0.0492761	0.0420989	B2M/IRF1/TESC/IFNG/IGF1/IRF7/AvBD10/NTN1/S100A12/IL8L2/RSFR/CATHB1/CSF3/LOC395551/NOS2/PTN/TMEM173/BF2/LY6E/EXFABP	20
	GO:0045597	BP	GO:0045597	positive regulation of cell differentiation	30286	97/2090	0.000279405	0.0492761	0.0420989	TESC/CYR61/NEUROD1/IFNG/FGF2/NTRK2/IGF1/NTN1/CSF3/PTN/EXFABP/JUND	12
	GO:0009605	BP	GO:0009605	response to external stimulus	20/82	229/2090	0.000330729	0.0492761	0.0420989	PER2/CAPN3/IFNG/FGF2/IGF1/IRF7/NRG1/EPHA7/AvBD10/NTN1/S100A12/IL8L2/RSFR/CATHB1/MT4/LOC395551/NOS2/PTN/TMEM173/EXFABP	20
	GO:0051240	BP	GO:0051240	positive regulation of multicellular organismal process	14/82	133/2090	0.000471085	0.0492761	0.0420989	B2M/TESC/CYR61/NEUROD1/IFNG/FGF2/NTRK2/IGF1/IRF7/NTN1/NOS2/PTN/TMEM173/EXFABP	14
	GO:0042221	BP	GO:0042221	response to chemical	28/82	390/2090	0.000488736	0.0492761	0.0420989	B2M/TESC/CYR61/CAPN3/IFNG/FGF2/NTRK2/IGF1/ESR1/GLDC/NRG1/EPHA7/NTN1/S100A12/IL8L2/FGF3/MT4/CSF3/HBAD/LOC395551/HSP90AA1/NOS2/PTN/TMEM173/EXFABP/HBA1/JUND/NTF3	28
	GO:0043207	BP	GO:0043207	response to external biotic stimulus	30286	103/2090	0.000494141	0.0492761	0.0420989	IFNG/IRF7/AvBD10/S100A12/IL8L2/RSFR/CATHB1/MT4/LOC395551/NOS2/TMEM173/EXFABP	12
	GO:0051707	BP	GO:0051707	response to other organism	30286	103/2090	0.000494141	0.0492761	0.0420989	IFNG/IRF7/AvBD10/S100A12/IL8L2/RSFR/CATHB1/MT4/LOC395551/NOS2/TMEM173/EXFABP	12
	GO:0009607	BP	GO:0009607	response to biotic stimulus	30286	104/2090	0.000540902	0.0492761	0.0420989	IFNG/IRF7/AvBD10/S100A12/IL8L2/RSFR/CATHB1/MT4/LOC395551/NOS2/TMEM173/EXFABP	12
	GO:0006952	BP	GO:0006952	defense response	13/82	120/2090	0.000581131	0.0492761	0.0420989	IFNG/IGF1/IRF7/AvBD10/S100A12/IL8L2/RSFR/CATHB1/LOC395551/NOS2/PTN/TMEM173/EXFABP	13
	GO:0042246	BP	GO:0042246	tissue regeneration	30042	69703	0.000589006	0.0492761	0.0420989	CAPN3/FGF2/IGF1/PTN	4
	GO:0045669	BP	GO:0045669	positive regulation of osteoblast differentiation	30042	69703	0.000589006	0.0492761	0.0420989	CYR61/FGF2/IGF1/JUND	4
	GO:0044093	BP	GO:0044093	positive regulation of molecular function	14/82	136/2090	0.000594252	0.0492761	0.0420989	B2M/TESC/CYR61/CAPN3/IFNG/FGF2/NTRK2/IGF1/NRG1/EPHA7/CSF3/LOC395551/NOS2/TMEM173	14
	GO:0051094	BP	GO:0051094	positive regulation of developmental process	14/82	136/2090	0.000594252	0.0492761	0.0420989	B2M/TESC/CYR61/NEUROD1/CAPN3/IFNG/FGF2/NTRK2/IGF1/NTN1/CSF3/PTN/EXFABP/JUND	14
	GO:0060284	BP	GO:0060284	regulation of cell development	30164	51/2090	0.000640933	0.0492761	0.0420989	B2M/NEUROD1/IFNG/NTRK2/IGF1/EPHA7/NTN1/PTN	8
	GO:0010628	BP	GO:0010628	positive regulation of gene expression	30286	106/2090	0.000645714	0.0492761	0.0420989	B2M/IFNG/FGF2/NTRK2/IGF1/ESR1/IRF7/FAM46C/IL8L2/FGF3/NOS2/TMEM173	12
	GO:0005576	CC	GO:0005576	extracellular region	32/82	330/2158	8.0563e-08	1.20039e-05	1.20039e-05	B2M/SST1/CYR61/IFNG/HPSE/CL2/FGF2/IGF1/NRG1/VCAN/AvBD10/LECT1/NTN1/S100A12/IL8L2/OGN/FGF3/RSFR/CATHB1/ANPEP/PI15/COL2A1/CSF3/LOC395551/SEMA3C/PTN/GRP/BF2/ANGPT1L/EXFABP/HBA1/NTF3	32
	GO:0005615	CC	GO:0005615	extracellular space	23/82	234/2158	8.50261e-06	0.000633444	0.000633444	SST1/IFNG/FGF2/IGF1/NRG1/AvBD10/S100A12/IL8L2/FGF3/CATHB1/ANPEP/PI15/COL2A1/CSF3/LOC395551/SEMA3C/PTN/GRP/BF2/ANGPT1L/EXFABP/HBA1/NTF3	23
	GO:0008083	MF	GO:0008083	growth factor activity	29465	35/1927	6.83897e-06	0.00122236	0.0011751	FGF2/IGF1/NRG1/IL8L2/OGN/FGF3/CSF3/PTN/NTF3	9
	GO:0030545	MF	GO:0030545	signaling receptor regulator activity	15/80	104/1927	1.24731e-05	0.00122236	0.0011751	SST1/IFNG/FGF2/IGF1/NRG1/EPHA7/NTN1/IL8L2/OGN/FGF3/CSF3/LOC395551/PTN/LY6E/NTF3	15
	GO:0048018	MF	GO:0048018	receptor ligand activity	14/80	102/1927	4.53447e-05	0.00248634	0.00239019	SST1/IFNG/FGF2/IGF1/NRG1/EPHA7/NTN1/IL8L2/OGN/FGF3/CSF3/LOC395551/PTN/NTF3	14
	GO:0030546	MF	GO:0030546	signaling receptor activator activity	14/80	103/1927	5.07416e-05	0.00248634	0.00239019	SST1/IFNG/FGF2/IGF1/NRG1/EPHA7/NTN1/IL8L2/OGN/FGF3/CSF3/LOC395551/PTN/NTF3	14
	GO:0050839	MF	GO:0050839	cell adhesion molecule binding	29434	37/1927	9.00392e-05	0.00352954	0.00339306	CDH1/CYR61/FGF2/IGF1/CDH6/CDH7/NRG1/PTN	8
	GO:0005102	MF	GO:0005102	signaling receptor binding	18/80	171/1927	0.000128071	0.00418365	0.00402188	SST1/CYR61/IFNG/FGF2/IGF1/NRG1/EPHA7/AvBD10/NTN1/S100A12/IL8L2/OGN/FGF3/CSF3/LOC395551/SEMA3C/PTN/NTF3	18
	GO:0005178	MF	GO:0005178	integrin binding	29342	14/1927	0.000162366	0.00454624	0.00437044	CYR61/FGF2/IGF1/NRG1/PTN	5
	GO:0098772	MF	GO:0098772	molecular function regulator	20/80	242/1927	0.00139628	0.0342089	0.0328861	SST1/TESC/CAPN3/IFNG/FGF2/IGF1/NRG1/EPHA7/NTN1/IL8L2/OGN/FGF3/SOCS3/PI15/CSF3/LOC395551/HSP90AA1/PTN/LY6E/NTF3	20
L7 vs L21	GO:0009605	BP	GO:0009605	response to external stimulus	20/68	229/2090	1.82056e-05	0.0171337	0.0156251	TUBB3/DRAXIN/IGF1/ISL1/NRG1/EPHA7/LYG2/S100A12/AVD/IL8L2/RSFR/FOS/LOC395551/NOS2/AGTR1/EFNA2/LHFPL5/PTN/AvBD5/EXFABP	20
	GO:0006935	BP	GO:0006935	chemotaxis	25143	83/2090	4.80383e-05	0.0171337	0.0156251	TUBB3/DRAXIN/ISL1/NRG1/EPHA7/IL8L2/LOC395551/AGTR1/EFNA2/PTN/AvBD5	11
	GO:0042330	BP	GO:0042330	taxis	25143	83/2090	4.80383e-05	0.0171337	0.0156251	TUBB3/DRAXIN/ISL1/NRG1/EPHA7/IL8L2/LOC395551/AGTR1/EFNA2/PTN/AvBD5	11
	GO:0006952	BP	GO:0006952	defense response	13/68	120/2090	8.15987e-05	0.0218277	0.0199058	IGF1/ISL1/LYG2/S100A12/AVD/IL8L2/RSFR/LOC395551/NOS2/AGTR1/PTN/AvBD5/EXFABP	13
	GO:0005576	CC	GO:0005576	extracellular region	30/69	330/2158	1.08057e-08	1.40475e-06	1.40475e-06	DRAXIN/PLAU/SST1/FGB/ENTPD5/SPP1/IGF1/ZPBP1/NRG1/ALDOB/COL12A1/LYG2/SERPINB10B/S100A12/AVD/IL8L2/RSFR/LOC396365/ANPEP/PI15/COL2A1/CSF3/ART1L3/LOC395551/SPON1/PTN/ANGPT1L/AvBD5/EXFABP/HBA1	30
	GO:0005615	CC	GO:0005615	extracellular space	22/69	234/2158	1.26148e-06	8.19963e-05	8.19963e-05	PLAU/SST1/FGB/SPP1/IGF1/NRG1/ALDOB/COL12A1/SERPINB10B/S100A12/IL8L2/ANPEP/PI15/COL2A1/CSF3/ART1L3/LOC395551/PTN/ANGPT1L/AvBD5/EXFABP/HBA1	22
	GO:0005102	MF	GO:0005102	signaling receptor binding	15/66	171/1927	0.00042904	0.0258488	0.0225713	SST1/FGB/SPP1/IGF1/NRG1/EPHA7/S100A12/IL8L2/LOC396365/CSF3/LOC395551/AGTR1/EFNA2/PTN/AvBD5	15
	GO:0048018	MF	GO:0048018	receptor ligand activity	24412	102/1927	0.000495545	0.0258488	0.0225713	SST1/SPP1/IGF1/NRG1/EPHA7/IL8L2/LOC396365/CSF3/LOC395551/PTN/AvBD5	11
	GO:0030546	MF	GO:0030546	signaling receptor activator activity	24412	103/1927	0.000539866	0.0258488	0.0225713	SST1/SPP1/IGF1/NRG1/EPHA7/IL8L2/LOC396365/CSF3/LOC395551/PTN/AvBD5	11
	GO:0030545	MF	GO:0030545	signaling receptor regulator activity	24412	104/1927	0.000587472	0.0258488	0.0225713	SST1/SPP1/IGF1/NRG1/EPHA7/IL8L2/LOC396365/CSF3/LOC395551/PTN/AvBD5	11
KEGG
	Cluster	ID	Description	GeneRatio	BgRatio	pvalue	p.adjust	qvalue	geneID	Count
	H7vsL7	gga03320	PPAR signaling pathway	18780	63/5041	3.47362e-05	0.00225785	0.00186479	SCD/CD36/FABP2/LPL/MMP1/FABP4	6
		gga00140	Steroid hormone biosynthesis	18719	36/5041	0.000431223	0.0140147	0.0115749	HSD11B1B/CYP3A5/RP11-400G3.5/CYP2C18	4
		gga00830	Retinol metabolism	18719	41/5041	0.000714248	0.0154754	0.0127813	CYP3A5/CYP26A1/RP11-400G3.5/CYP2C18	4
		gga00591	Linoleic acid metabolism	18688	29/5041	0.00296191	0.0388195	0.0320615	CYP3A5/RP11-400G3.5/CYP2C18	3
		gga00561	Glycerolipid metabolism	18719	60/5041	0.00298612	0.0388195	0.0320615	LOC425137/LOC772271/LPL/LPIN1	4
		gga00051	Fructose and mannose metabolism	18688	35/5041	0.00508401	0.0550768	0.0454885	LOC425137/LOC772271/ALDOB	3
	H21vsL21	gga03010	Ribosome	26/270	121/5041	5.44045e-10	7.18139e-08	6.87214e-08	RPL9/MRPL17/RPL10A/RPL26L1/RPL7A/RPS24/RPS2/RPL5/RPL27A/RPL13/MRPS11/RPS8/RPL37/RPS6/RPS15/RPS23/RPS7/MRPL35/RPL29/RPL30/RPL34/RPL7/RPL17/RPL14/RPS15A/MRPS21	26
		gga00190	Oxidative phosphorylation	16/270	117/5041	0.000440195	0.0290529	0.0278018	UQCR11/ATP5PB/ATP6V0A1/ATP6V1G1/UQCR10/NDUFS6/ATP5I/COX7A2/NDUFA9/UQCRFS1/COX7C/NDUFS4/NDUFV2/ATP5F1AZ/COX7A2L/NDUFB7	16
		gga03018	RNA degradation	11/270	69/5041	0.000962079	0.0423315	0.0405086	DCP2/ENO1/C1D/LSM8/CNOT7/SKIV2L2/EXOSC8/EXOSC7/LSM3/CNOT6/LSM5	11
		gga01212	Fatty acid metabolism	9/270	53/5041	0.00175719	0.0579872	0.0554901	HSD17B4/ACSL4/OXSM/ELOVL7/HACD4/ACAA2/FASN/ACADSB/HTD2	9
	H7vsH21	gga04060	Cytokine-cytokine receptor interaction	25/187	202/5041	7.00149e-08	7.07151e-06	6.4119e-06	CSF3R/TNFRSF6B/IL9R/IL5RA/TNFSF10/IFNG/IL22/CXCL13L2/IL17A/IL13RA2/IL8L2/TNFRSF25/CCL19/IL1B/IL6R/CSF3/LOC395551/CCL4/IL12RB1/GDF6/AMH/CCL5/CXCL13/CRLF2/IL1R2	25
		gga04020	Calcium signaling pathway	22/187	225/5041	2.36026e-05	0.00119193	0.00108075	CAMK1G/MST1/ERBB4/NTSR1/TNNC2/PDE1A/RYR3/RYR2/FGF2/NTRK2/LOC422929/EDNRB/HTR2A/FGF3/GRIN2C/FGF7/HGF/NOS2/PDE1B/FGF22/P2RX2/LOC770074	22
		gga04514	Cell adhesion molecules	14/187	127/5041	0.000223185	0.00723066	0.0065562	DMA/CDH1/ITGB8/VCAN/MADCAM1/SELE/PDCD1LG2/CNTNAP2/CD8A/CLDN15/BF2/CD6/LOC770074/LOC107049666	14
		gga00220	Arginine biosynthesis	5/187	17/5041	0.000286363	0.00723066	0.0065562	ASL1/ASL/GSL/ASS1/NOS2	5
		gga04080	Neuroactive ligand-receptor interaction	25/187	344/5041	0.000800809	0.0161763	0.0146674	GRIK3/SST7/PLG/NPFFR1/NTSR1/SST1/TAC1/TSHR/LYPD6/S1PR4/GZMA/PTGER4/GABRR2/LOC422929/EDNRB/HTR2A/GRIN2C/GPR35/PRLH/GRP/P2RX2/KNG1/ADM/C5AR1/HRH4	25
		gga04623	Cytosolic DNA-sensing pathway	7/187	44/5041	0.00103254	0.0173811	0.0157599	IKBKE/IRF7/IL1B/LOC395551/CCL4/TMEM173/CCL5	7
		gga04620	Toll-like receptor signaling pathway	9/187	84/5041	0.00365064	0.0526736	0.0477603	IKBKE/IRF7/IL8L2/IL1B/LY96/LOC395551/CCL4/IRF5/CCL5	9
		gga05164	Influenza A	12/187	139/5041	0.00514137	0.0649098	0.0588552	DMA/PLG/TNFSF10/IFNG/IKBKE/IRF7/IL8L2/SOCS3/IL1B/CCL5/PMLL/DNAJB1	12
	L7vsL21	gga04060	Cytokine-cytokine receptor interaction	20/150	202/5041	1.64055e-06	0.000175538	0.000160601	CSF3R/IL22/CXCL13L2/IL8L1/IL17A/IL13RA2/IL8L2/CCL19/GDF9/CSF3/LOC395551/CCL4/IL12RB1/CXCR1/GDF5/ACKR4/CLCF1/CXCL13/LOC100857191/IL1R2	20
		gga00220	Arginine biosynthesis	5/150	17/5041	0.000101124	0.00541012	0.00494974	ASL1/ASL/GSL/GPT2/NOS2	5
		gga00250	Alanine, aspartate and glutamate metabolism	6/150	34/5041	0.000423838	0.0123361	0.0112863	IL4I1/ASL1/ASL/GSL/DDO/GPT2	6
		gga04080	Neuroactive ligand-receptor interaction	22/150	344/5041	0.000461162	0.0123361	0.0112863	GALR2/GALR1L/SSTR2/NPFFR1/HRH1/GRIN2A/SST1/LPAR3/TSHR/GCGR/S1PR4/GZMA/GLRA2/EDNRB/LOC428525/GRPR/AGTR1/P2RX2/KNG1/ADM/C5AR1/ADRA2B	22
		gga01230	Biosynthesis of amino acids	7/150	59/5041	0.00167323	0.0358071	0.0327601	ASL1/ASL/SDSL/GSL/ALDOB/LOC101747660/GPT2	7
		gga04020	Calcium signaling pathway	15/150	225/5041	0.00261424	0.0466205	0.0426533	CAMK1G/MST1/HRH1/GRIN2A/PLCB1/RYR3/RYR2/EDNRB/GRPR/ADCY1/HGF/NOS2/AGTR1/PDE1B/P2RX2	15
