# Supplementary material for: Gene Co-Expression Network Analysis Reveals the Hub Genes and Key Pathways Associated with Resistance to Salmonella Enteritidis Colonization in Chicken
Source: Int J Mol Sci. 2023 Mar 2;24(5):4824. doi: 10.3390/ijms24054824 (PMC10003191; doi:10.3390/ijms24054824)
Supplement: Supplementary file 1 [file ijms-24-04824-s001.zip › Supplementary Table S3.xlsx]

## Sheet: Sheet1
	x
TFs	1	ENSGALG00000000233
TFs	2	ENSGALG00000000513
TFs	3	ENSGALG00000002018
TFs	4	ENSGALG00000002139
TFs	5	ENSGALG00000002305
TFs	6	ENSGALG00000002523
TFs	7	ENSGALG00000003120
TFs	8	ENSGALG00000003282
TFs	9	ENSGALG00000003396
TFs	10	ENSGALG00000003939
TFs	11	ENSGALG00000004532
TFs	12	ENSGALG00000004570
TFs	13	ENSGALG00000005415
TFs	14	ENSGALG00000005506
TFs	15	ENSGALG00000005530
TFs	16	ENSGALG00000005653
TFs	17	ENSGALG00000006113
TFs	18	ENSGALG00000006309
TFs	19	ENSGALG00000006445
TFs	20	ENSGALG00000006785
TFs	21	ENSGALG00000006966
TFs	22	ENSGALG00000007260
TFs	23	ENSGALG00000007266
TFs	24	ENSGALG00000007989
TFs	25	ENSGALG00000009168
TFs	26	ENSGALG00000010630
TFs	27	ENSGALG00000010869
TFs	28	ENSGALG00000010870
TFs	29	ENSGALG00000010971
TFs	30	ENSGALG00000011349
TFs	31	ENSGALG00000011958
TFs	32	ENSGALG00000012579
TFs	33	ENSGALG00000013408
TFs	34	ENSGALG00000013657
TFs	35	ENSGALG00000013793
TFs	36	ENSGALG00000013935
TFs	37	ENSGALG00000014096
TFs	38	ENSGALG00000014954
TFs	39	ENSGALG00000015334
TFs	40	ENSGALG00000016191
TFs	41	ENSGALG00000016440
TFs	42	ENSGALG00000016516
TFs	43	ENSGALG00000016617
TFs	44	ENSGALG00000022866
TFs	45	ENSGALG00000023407
TFs	46	ENSGALG00000023420
TFs	47	ENSGALG00000024051
TFs	48	ENSGALG00000025759
TFs	49	ENSGALG00000025907
TFs	50	ENSGALG00000026558
TFs	51	ENSGALG00000026698
TFs	52	ENSGALG00000027823
TFs	53	ENSGALG00000029022
TFs	54	ENSGALG00000029588
TFs	55	ENSGALG00000030147
TFs	56	ENSGALG00000030396
TFs	57	ENSGALG00000031482
TFs	58	ENSGALG00000031700
TFs	59	ENSGALG00000032249
TFs	60	ENSGALG00000032713
TFs	61	ENSGALG00000033102
TFs	62	ENSGALG00000033174
TFs	63	ENSGALG00000034003
TFs	64	ENSGALG00000034999
TFs	65	ENSGALG00000035352
TFs	66	ENSGALG00000035472
TFs	67	ENSGALG00000035487
TFs	68	ENSGALG00000035734
TFs	69	ENSGALG00000036128
TFs	70	ENSGALG00000036163
TFs	71	ENSGALG00000036459
TFs	72	ENSGALG00000037595
TFs	73	ENSGALG00000038420
TFs	74	ENSGALG00000038657
TFs	75	ENSGALG00000038780
TFs	76	ENSGALG00000039134
TFs	77	ENSGALG00000039206
TFs	78	ENSGALG00000039228
TFs	79	ENSGALG00000040087
TFs	80	ENSGALG00000040270
TFs	81	ENSGALG00000040475
TFs	82	ENSGALG00000041592
TFs	83	ENSGALG00000042422
TFs	84	ENSGALG00000042976
TFs	85	ENSGALG00000043724
TFs	86	ENSGALG00000045611
TCFs	87	ENSGALG00000000156
TCFs	88	ENSGALG00000000542
TCFs	89	ENSGALG00000000589
TCFs	90	ENSGALG00000001595
TCFs	91	ENSGALG00000002138
TCFs	92	ENSGALG00000002942
TCFs	93	ENSGALG00000003026
TCFs	94	ENSGALG00000003096
TCFs	95	ENSGALG00000003566
TCFs	96	ENSGALG00000003596
TCFs	97	ENSGALG00000003641
TCFs	98	ENSGALG00000004108
TCFs	99	ENSGALG00000004192
TCFs	100	ENSGALG00000004542
TCFs	101	ENSGALG00000004998
TCFs	102	ENSGALG00000005105
TCFs	103	ENSGALG00000005521
TCFs	104	ENSGALG00000005618
TCFs	105	ENSGALG00000006512
TCFs	106	ENSGALG00000006599
TCFs	107	ENSGALG00000007286
TCFs	108	ENSGALG00000007341
TCFs	109	ENSGALG00000007641
TCFs	110	ENSGALG00000007762
TCFs	111	ENSGALG00000007843
TCFs	112	ENSGALG00000008149
TCFs	113	ENSGALG00000008916
TCFs	114	ENSGALG00000009782
TCFs	115	ENSGALG00000009942
TCFs	116	ENSGALG00000009967
TCFs	117	ENSGALG00000009992
TCFs	118	ENSGALG00000010088
TCFs	119	ENSGALG00000010763
TCFs	120	ENSGALG00000011177
TCFs	121	ENSGALG00000011276
TCFs	122	ENSGALG00000012207
TCFs	123	ENSGALG00000014834
TCFs	124	ENSGALG00000015027
TCFs	125	ENSGALG00000015346
TCFs	126	ENSGALG00000015465
TCFs	127	ENSGALG00000015580
TCFs	128	ENSGALG00000015780
TCFs	129	ENSGALG00000015889
TCFs	130	ENSGALG00000016065
TCFs	131	ENSGALG00000016915
TCFs	132	ENSGALG00000017073
TCFs	133	ENSGALG00000017105
TCFs	134	ENSGALG00000020590
TCFs	135	ENSGALG00000025868
TCFs	136	ENSGALG00000027864
TCFs	137	ENSGALG00000029616
TCFs	138	ENSGALG00000029691
TCFs	139	ENSGALG00000030598
TCFs	140	ENSGALG00000030899
TCFs	141	ENSGALG00000031839
TCFs	142	ENSGALG00000032410
TCFs	143	ENSGALG00000032847
TCFs	144	ENSGALG00000034124
TCFs	145	ENSGALG00000034725
TCFs	146	ENSGALG00000034768
TCFs	147	ENSGALG00000034802
TCFs	148	ENSGALG00000035203
TCFs	149	ENSGALG00000036356
TCFs	150	ENSGALG00000036785
TCFs	151	ENSGALG00000037778
TCFs	152	ENSGALG00000038222
TCFs	153	ENSGALG00000039068
TCFs	154	ENSGALG00000039178
TCFs	155	ENSGALG00000039212
TCFs	156	ENSGALG00000039563
TCFs	157	ENSGALG00000039710
TCFs	158	ENSGALG00000040464
TCFs	159	ENSGALG00000040646
TCFs	160	ENSGALG00000041616
TCFs	161	ENSGALG00000041795
TCFs	162	ENSGALG00000041989
TCFs	163	ENSGALG00000042400
TCFs	164	ENSGALG00000042822
TCFs	165	ENSGALG00000044525
