# Supplementary material for: Gene Co-Expression Network Analysis Reveals the Hub Genes and Key Pathways Associated with Resistance to Salmonella Enteritidis Colonization in Chicken
Source: Int J Mol Sci. 2023 Mar 2;24(5):4824. doi: 10.3390/ijms24054824 (PMC10003191; doi:10.3390/ijms24054824)
Supplement: Supplementary file 1 [file ijms-24-04824-s001.zip › Supplementary Table S4.xlsx]

## Sheet: Sheet1
GO	ONTOLOGY	ID	Description	GeneRatio	BgRatio	pvalue	p.adjust	qvalue	geneID	Count
GO:0006355	BP	GO:0006355	regulation of transcription, DNA-templated	24/31	399/2090	2.1307e-12	2.86549e-10	2.58096e-10	HESX1/NFKB2/ZNF326/SMAD5/IRF1/ZEB1/MYSM1/JUN/TEF/CLOCK/ARNTL2/ZBTB7A/Pou5f3/MAX/ZBTB17/HSF2/GLI1/RAF1/PER2/LDB1/NCOA7/UFL1/CBFA2T3/SETD3	24
GO:1903506	BP	GO:1903506	regulation of nucleic acid-templated transcription	24/31	399/2090	2.1307e-12	2.86549e-10	2.58096e-10	HESX1/NFKB2/ZNF326/SMAD5/IRF1/ZEB1/MYSM1/JUN/TEF/CLOCK/ARNTL2/ZBTB7A/Pou5f3/MAX/ZBTB17/HSF2/GLI1/RAF1/PER2/LDB1/NCOA7/UFL1/CBFA2T3/SETD3	24
GO:2001141	BP	GO:2001141	regulation of RNA biosynthetic process	24/31	399/2090	2.1307e-12	2.86549e-10	2.58096e-10	HESX1/NFKB2/ZNF326/SMAD5/IRF1/ZEB1/MYSM1/JUN/TEF/CLOCK/ARNTL2/ZBTB7A/Pou5f3/MAX/ZBTB17/HSF2/GLI1/RAF1/PER2/LDB1/NCOA7/UFL1/CBFA2T3/SETD3	24
GO:2000112	BP	GO:2000112	regulation of cellular macromolecule biosynthetic process	25/31	457/2090	3.53338e-12	2.86549e-10	2.58096e-10	HESX1/NFKB2/ZNF326/SMAD5/IRF1/ZEB1/MYSM1/JUN/TEF/CLOCK/ARNTL2/ZBTB7A/Pou5f3/MAX/ZBTB17/HSF2/GLI1/RAF1/PER2/LDB1/NCOA7/ASCC3/UFL1/CBFA2T3/SETD3	25
GO:0010556	BP	GO:0010556	regulation of macromolecule biosynthetic process	25/31	460/2090	4.13622e-12	2.86549e-10	2.58096e-10	HESX1/NFKB2/ZNF326/SMAD5/IRF1/ZEB1/MYSM1/JUN/TEF/CLOCK/ARNTL2/ZBTB7A/Pou5f3/MAX/ZBTB17/HSF2/GLI1/RAF1/PER2/LDB1/NCOA7/ASCC3/UFL1/CBFA2T3/SETD3	25
GO:0006351	BP	GO:0006351	transcription, DNA-templated	24/31	412/2090	4.4696e-12	2.86549e-10	2.58096e-10	HESX1/NFKB2/ZNF326/SMAD5/IRF1/ZEB1/MYSM1/JUN/TEF/CLOCK/ARNTL2/ZBTB7A/Pou5f3/MAX/ZBTB17/HSF2/GLI1/RAF1/PER2/LDB1/NCOA7/UFL1/CBFA2T3/SETD3	24
GO:0097659	BP	GO:0097659	nucleic acid-templated transcription	24/31	412/2090	4.4696e-12	2.86549e-10	2.58096e-10	HESX1/NFKB2/ZNF326/SMAD5/IRF1/ZEB1/MYSM1/JUN/TEF/CLOCK/ARNTL2/ZBTB7A/Pou5f3/MAX/ZBTB17/HSF2/GLI1/RAF1/PER2/LDB1/NCOA7/UFL1/CBFA2T3/SETD3	24
GO:0032774	BP	GO:0032774	RNA biosynthetic process	24/31	413/2090	4.72658e-12	2.86549e-10	2.58096e-10	HESX1/NFKB2/ZNF326/SMAD5/IRF1/ZEB1/MYSM1/JUN/TEF/CLOCK/ARNTL2/ZBTB7A/Pou5f3/MAX/ZBTB17/HSF2/GLI1/RAF1/PER2/LDB1/NCOA7/UFL1/CBFA2T3/SETD3	24
GO:0031326	BP	GO:0031326	regulation of cellular biosynthetic process	25/31	473/2090	8.08018e-12	4.35432e-10	3.92196e-10	HESX1/NFKB2/ZNF326/SMAD5/IRF1/ZEB1/MYSM1/JUN/TEF/CLOCK/ARNTL2/ZBTB7A/Pou5f3/MAX/ZBTB17/HSF2/GLI1/RAF1/PER2/LDB1/NCOA7/ASCC3/UFL1/CBFA2T3/SETD3	25
GO:0009889	BP	GO:0009889	regulation of biosynthetic process	25/31	477/2090	9.88807e-12	4.79571e-10	4.31953e-10	HESX1/NFKB2/ZNF326/SMAD5/IRF1/ZEB1/MYSM1/JUN/TEF/CLOCK/ARNTL2/ZBTB7A/Pou5f3/MAX/ZBTB17/HSF2/GLI1/RAF1/PER2/LDB1/NCOA7/ASCC3/UFL1/CBFA2T3/SETD3	25
GO:0051252	BP	GO:0051252	regulation of RNA metabolic process	24/31	430/2090	1.19532e-11	5.27029e-10	4.74698e-10	HESX1/NFKB2/ZNF326/SMAD5/IRF1/ZEB1/MYSM1/JUN/TEF/CLOCK/ARNTL2/ZBTB7A/Pou5f3/MAX/ZBTB17/HSF2/GLI1/RAF1/PER2/LDB1/NCOA7/UFL1/CBFA2T3/SETD3	24
GO:0034654	BP	GO:0034654	nucleobase-containing compound biosynthetic process	24/31	457/2090	4.80833e-11	1.94337e-09	1.7504e-09	HESX1/NFKB2/ZNF326/SMAD5/IRF1/ZEB1/MYSM1/JUN/TEF/CLOCK/ARNTL2/ZBTB7A/Pou5f3/MAX/ZBTB17/HSF2/GLI1/RAF1/PER2/LDB1/NCOA7/UFL1/CBFA2T3/SETD3	24
GO:0019219	BP	GO:0019219	regulation of nucleobase-containing compound metabolic process	24/31	462/2090	6.159e-11	2.29778e-09	2.06962e-09	HESX1/NFKB2/ZNF326/SMAD5/IRF1/ZEB1/MYSM1/JUN/TEF/CLOCK/ARNTL2/ZBTB7A/Pou5f3/MAX/ZBTB17/HSF2/GLI1/RAF1/PER2/LDB1/NCOA7/UFL1/CBFA2T3/SETD3	24
GO:0018130	BP	GO:0018130	heterocycle biosynthetic process	24/31	470/2090	9.09542e-11	3.15091e-09	2.83804e-09	HESX1/NFKB2/ZNF326/SMAD5/IRF1/ZEB1/MYSM1/JUN/TEF/CLOCK/ARNTL2/ZBTB7A/Pou5f3/MAX/ZBTB17/HSF2/GLI1/RAF1/PER2/LDB1/NCOA7/UFL1/CBFA2T3/SETD3	24
GO:0019438	BP	GO:0019438	aromatic compound biosynthetic process	24/31	473/2090	1.05069e-10	3.39722e-09	3.05989e-09	HESX1/NFKB2/ZNF326/SMAD5/IRF1/ZEB1/MYSM1/JUN/TEF/CLOCK/ARNTL2/ZBTB7A/Pou5f3/MAX/ZBTB17/HSF2/GLI1/RAF1/PER2/LDB1/NCOA7/UFL1/CBFA2T3/SETD3	24
GO:1901362	BP	GO:1901362	organic cyclic compound biosynthetic process	24/31	489/2090	2.22918e-10	6.7572e-09	6.08624e-09	HESX1/NFKB2/ZNF326/SMAD5/IRF1/ZEB1/MYSM1/JUN/TEF/CLOCK/ARNTL2/ZBTB7A/Pou5f3/MAX/ZBTB17/HSF2/GLI1/RAF1/PER2/LDB1/NCOA7/UFL1/CBFA2T3/SETD3	24
GO:0006357	BP	GO:0006357	regulation of transcription by RNA polymerase II	19/31	315/2090	3.708e-09	1.05787e-07	9.5283e-08	HESX1/SMAD5/IRF1/MYSM1/JUN/TEF/CLOCK/ARNTL2/ZBTB7A/Pou5f3/MAX/ZBTB17/HSF2/GLI1/RAF1/PER2/LDB1/NCOA7/SETD3	19
GO:0006366	BP	GO:0006366	transcription by RNA polymerase II	19/31	323/2090	5.75499e-09	1.55065e-07	1.39668e-07	HESX1/SMAD5/IRF1/MYSM1/JUN/TEF/CLOCK/ARNTL2/ZBTB7A/Pou5f3/MAX/ZBTB17/HSF2/GLI1/RAF1/PER2/LDB1/NCOA7/SETD3	19
GO:0045892	BP	GO:0045892	negative regulation of transcription, DNA-templated	0.290323	125/2090	4.82822e-05	0.00111509	0.00100437	HESX1/SMAD5/ZEB1/ZBTB7A/MAX/ZBTB17/PER2/LDB1/CBFA2T3	9
GO:1902679	BP	GO:1902679	negative regulation of RNA biosynthetic process	0.290323	125/2090	4.82822e-05	0.00111509	0.00100437	HESX1/SMAD5/ZEB1/ZBTB7A/MAX/ZBTB17/PER2/LDB1/CBFA2T3	9
GO:1903507	BP	GO:1903507	negative regulation of nucleic acid-templated transcription	0.290323	125/2090	4.82822e-05	0.00111509	0.00100437	HESX1/SMAD5/ZEB1/ZBTB7A/MAX/ZBTB17/PER2/LDB1/CBFA2T3	9
GO:0051253	BP	GO:0051253	negative regulation of RNA metabolic process	0.290323	136/2090	9.47281e-05	0.00208832	0.00188097	HESX1/SMAD5/ZEB1/ZBTB7A/MAX/ZBTB17/PER2/LDB1/CBFA2T3	9
GO:0000122	BP	GO:0000122	negative regulation of transcription by RNA polymerase II	0.225806	82/2090	0.000135659	0.00286064	0.00257659	HESX1/SMAD5/ZBTB7A/MAX/ZBTB17/PER2/LDB1	7
GO:0045893	BP	GO:0045893	positive regulation of transcription, DNA-templated	0.322581	184/2090	0.000188741	0.00352074	0.00317115	SMAD5/MYSM1/TEF/ARNTL2/MAX/GLI1/RAF1/LDB1/NCOA7/SETD3	10
GO:1902680	BP	GO:1902680	positive regulation of RNA biosynthetic process	0.322581	184/2090	0.000188741	0.00352074	0.00317115	SMAD5/MYSM1/TEF/ARNTL2/MAX/GLI1/RAF1/LDB1/NCOA7/SETD3	10
GO:1903508	BP	GO:1903508	positive regulation of nucleic acid-templated transcription	0.322581	184/2090	0.000188741	0.00352074	0.00317115	SMAD5/MYSM1/TEF/ARNTL2/MAX/GLI1/RAF1/LDB1/NCOA7/SETD3	10
GO:0030218	BP	GO:0030218	erythrocyte differentiation	0.129032	21/2090	0.000199042	0.00357539	0.00322037	SMAD5/LDB1/JAK2/UFL1	4
GO:0045934	BP	GO:0045934	negative regulation of nucleobase-containing compound metabolic process	0.290323	154/2090	0.000250114	0.00433233	0.00390215	HESX1/SMAD5/ZEB1/ZBTB7A/MAX/ZBTB17/PER2/LDB1/CBFA2T3	9
GO:2000113	BP	GO:2000113	negative regulation of cellular macromolecule biosynthetic process	0.290323	156/2090	0.000276192	0.00453807	0.00408746	HESX1/SMAD5/ZEB1/ZBTB7A/MAX/ZBTB17/PER2/LDB1/CBFA2T3	9
GO:0034101	BP	GO:0034101	erythrocyte homeostasis	0.129032	23/2090	0.000288428	0.00453807	0.00408746	SMAD5/LDB1/JAK2/UFL1	4
GO:0010558	BP	GO:0010558	negative regulation of macromolecule biosynthetic process	0.290323	157/2090	0.000290062	0.00453807	0.00408746	HESX1/SMAD5/ZEB1/ZBTB7A/MAX/ZBTB17/PER2/LDB1/CBFA2T3	9
GO:0051254	BP	GO:0051254	positive regulation of RNA metabolic process	0.322581	196/2090	0.000320425	0.00485645	0.00437423	SMAD5/MYSM1/TEF/ARNTL2/MAX/GLI1/RAF1/LDB1/NCOA7/SETD3	10
GO:0031327	BP	GO:0031327	negative regulation of cellular biosynthetic process	0.290323	160/2090	0.000335218	0.00492669	0.00443749	HESX1/SMAD5/ZEB1/ZBTB7A/MAX/ZBTB17/PER2/LDB1/CBFA2T3	9
GO:0009890	BP	GO:0009890	negative regulation of biosynthetic process	0.290323	161/2090	0.000351516	0.00501428	0.00451639	HESX1/SMAD5/ZEB1/ZBTB7A/MAX/ZBTB17/PER2/LDB1/CBFA2T3	9
GO:0002262	BP	GO:0002262	myeloid cell homeostasis	0.129032	26/2090	0.000472001	0.00650737	0.00586122	SMAD5/LDB1/JAK2/UFL1	4
GO:0010557	BP	GO:0010557	positive regulation of macromolecule biosynthetic process	0.322581	206/2090	0.000483021	0.00650737	0.00586122	SMAD5/MYSM1/TEF/ARNTL2/MAX/GLI1/RAF1/LDB1/NCOA7/SETD3	10
GO:0045935	BP	GO:0045935	positive regulation of nucleobase-containing compound metabolic process	0.322581	214/2090	0.000658697	0.0085148	0.00766933	SMAD5/MYSM1/TEF/ARNTL2/MAX/GLI1/RAF1/LDB1/NCOA7/SETD3	10
GO:0045944	BP	GO:0045944	positive regulation of transcription by RNA polymerase II	0.258065	139/2090	0.000667139	0.0085148	0.00766933	SMAD5/MYSM1/TEF/MAX/GLI1/RAF1/LDB1/SETD3	8
GO:0031328	BP	GO:0031328	positive regulation of cellular biosynthetic process	0.322581	216/2090	0.000710135	0.00883117	0.00795428	SMAD5/MYSM1/TEF/ARNTL2/MAX/GLI1/RAF1/LDB1/NCOA7/SETD3	10
GO:0009891	BP	GO:0009891	positive regulation of biosynthetic process	0.322581	219/2090	0.000793573	0.00962208	0.00866666	SMAD5/MYSM1/TEF/ARNTL2/MAX/GLI1/RAF1/LDB1/NCOA7/SETD3	10
GO:0016570	BP	GO:0016570	histone modification	0.16129	55/2090	0.0010588	0.0125248	0.0112812	MYSM1/JAK2/UFL1/SGF29/SETD3	5
GO:0048872	BP	GO:0048872	homeostasis of number of cells	0.129032	35/2090	0.00150549	0.0173848	0.0156586	SMAD5/LDB1/JAK2/UFL1	4
GO:0051172	BP	GO:0051172	negative regulation of nitrogen compound metabolic process	0.322581	240/2090	0.00163824	0.0184778	0.0166431	HESX1/SMAD5/ZEB1/ZBTB7A/MAX/ZBTB17/HSF2/PER2/LDB1/CBFA2T3	10
GO:0031325	BP	GO:0031325	positive regulation of cellular metabolic process	0.387097	337/2090	0.00194712	0.0214626	0.0193315	SMAD5/MYSM1/TEF/ARNTL2/MAX/GLI1/RAF1/LDB1/NCOA7/JAK2/UFL1/SETD3	12
GO:0035270	BP	GO:0035270	endocrine system development	0.0967742	19/2090	0.00243937	0.026291	0.0236805	HESX1/GLI1/RAF1	3
GO:0031324	BP	GO:0031324	negative regulation of cellular metabolic process	0.322581	254/2090	0.00253654	0.026744	0.0240884	HESX1/SMAD5/ZEB1/ZBTB7A/MAX/ZBTB17/HSF2/PER2/LDB1/CBFA2T3	10
GO:0048511	BP	GO:0048511	rhythmic process	0.129032	41/2090	0.00273587	0.0282318	0.0254285	NFKB2/CLOCK/ARNTL2/PER2	4
GO:0030099	BP	GO:0030099	myeloid cell differentiation	0.129032	42/2090	0.00299262	0.0302379	0.0272354	SMAD5/LDB1/JAK2/UFL1	4
GO:0051173	BP	GO:0051173	positive regulation of nitrogen compound metabolic process	0.354839	314/2090	0.00372763	0.036896	0.0332324	SMAD5/MYSM1/TEF/ARNTL2/MAX/GLI1/RAF1/LDB1/NCOA7/JAK2/SETD3	11
GO:0009893	BP	GO:0009893	positive regulation of metabolic process	0.387097	371/2090	0.00451591	0.0438043	0.0394548	SMAD5/MYSM1/TEF/ARNTL2/MAX/GLI1/RAF1/LDB1/NCOA7/JAK2/UFL1/SETD3	12
GO:0007623	BP	GO:0007623	circadian rhythm	0.0967742	24/2090	0.00484541	0.0460789	0.0415035	CLOCK/ARNTL2/PER2	3
GO:0010605	BP	GO:0010605	negative regulation of macromolecule metabolic process	0.322581	278/2090	0.00498862	0.0461866	0.0416005	HESX1/SMAD5/ZEB1/ZBTB7A/MAX/ZBTB17/HSF2/PER2/LDB1/CBFA2T3	10
GO:0048534	BP	GO:0048534	hematopoietic or lymphoid organ development	0.16129	78/2090	0.0050472	0.0461866	0.0416005	SMAD5/RAF1/LDB1/JAK2/UFL1	5
GO:0005667	CC	GO:0005667	transcription regulator complex	0.225806	68/2158	3.25715e-05	0.00172629	0.00168	SMAD5/JUN/CLOCK/ARNTL2/MAX/LDB1/ASCC3	7
GO:0090575	CC	GO:0090575	RNA polymerase II transcription regulator complex	0.129032	28/2158	0.000561401	0.0148771	0.0144782	SMAD5/CLOCK/MAX/ASCC3	4
GO:0140110	MF	GO:0140110	transcription regulator activity	19/30	253/1927	1.34706e-10	1.27971e-08	1.07765e-08	HESX1/NFKB2/SMAD5/IRF1/MYSM1/JUN/TEF/CLOCK/ARNTL2/ZBTB7A/Pou5f3/MAX/ZBTB17/HSF2/GLI1/LDB1/NCOA7/CBFA2T3/SETD3	19
GO:0000978	MF	GO:0000978	RNA polymerase II cis-regulatory region sequence-specific DNA binding	14/30	172/1927	4.99315e-08	1.4995e-06	1.26274e-06	HESX1/SMAD5/IRF1/ZEB1/JUN/TEF/CLOCK/ARNTL2/ZBTB7A/Pou5f3/MAX/ZBTB17/HSF2/GLI1	14
GO:0000987	MF	GO:0000987	cis-regulatory region sequence-specific DNA binding	14/30	176/1927	6.74518e-08	1.4995e-06	1.26274e-06	HESX1/SMAD5/IRF1/ZEB1/JUN/TEF/CLOCK/ARNTL2/ZBTB7A/Pou5f3/MAX/ZBTB17/HSF2/GLI1	14
GO:0000976	MF	GO:0000976	transcription cis-regulatory region binding	15/30	210/1927	7.89212e-08	1.4995e-06	1.26274e-06	HESX1/SMAD5/IRF1/ZEB1/JUN/TEF/CLOCK/ARNTL2/ZBTB7A/Pou5f3/MAX/ZBTB17/HSF2/GLI1/PER2	15
GO:0001067	MF	GO:0001067	transcription regulatory region nucleic acid binding	15/30	210/1927	7.89212e-08	1.4995e-06	1.26274e-06	HESX1/SMAD5/IRF1/ZEB1/JUN/TEF/CLOCK/ARNTL2/ZBTB7A/Pou5f3/MAX/ZBTB17/HSF2/GLI1/PER2	15
GO:1990837	MF	GO:1990837	sequence-specific double-stranded DNA binding	15/30	213/1927	9.59919e-08	1.51987e-06	1.27989e-06	HESX1/SMAD5/IRF1/ZEB1/JUN/TEF/CLOCK/ARNTL2/ZBTB7A/Pou5f3/MAX/ZBTB17/HSF2/GLI1/PER2	15
GO:0003677	MF	GO:0003677	DNA binding	19/30	371/1927	1.14205e-07	1.54993e-06	1.3052e-06	HESX1/NFKB2/ZNF326/SMAD5/IRF1/ZEB1/MYSM1/JUN/TEF/BAZ2B/CLOCK/ARNTL2/ZBTB7A/Pou5f3/MAX/ZBTB17/HSF2/GLI1/PER2	19
GO:0043565	MF	GO:0043565	sequence-specific DNA binding	15/30	227/1927	2.29726e-07	2.51229e-06	2.11561e-06	HESX1/SMAD5/IRF1/ZEB1/JUN/TEF/CLOCK/ARNTL2/ZBTB7A/Pou5f3/MAX/ZBTB17/HSF2/GLI1/PER2	15
GO:0000977	MF	GO:0000977	RNA polymerase II transcription regulatory region sequence-specific DNA binding	14/30	194/1927	2.38006e-07	2.51229e-06	2.11561e-06	HESX1/SMAD5/IRF1/ZEB1/JUN/TEF/CLOCK/ARNTL2/ZBTB7A/Pou5f3/MAX/ZBTB17/HSF2/GLI1	14
GO:0003690	MF	GO:0003690	double-stranded DNA binding	15/30	231/1927	2.91352e-07	2.76785e-06	2.33082e-06	HESX1/SMAD5/IRF1/ZEB1/JUN/TEF/CLOCK/ARNTL2/ZBTB7A/Pou5f3/MAX/ZBTB17/HSF2/GLI1/PER2	15
GO:0003700	MF	GO:0003700	DNA-binding transcription factor activity	14/30	207/1927	5.4458e-07	4.70319e-06	3.96058e-06	HESX1/NFKB2/SMAD5/IRF1/JUN/TEF/CLOCK/ARNTL2/ZBTB7A/Pou5f3/MAX/ZBTB17/HSF2/GLI1	14
GO:0000981	MF	GO:0000981	DNA-binding transcription factor activity, RNA polymerase II-specific	0.4	197/1927	1.54625e-05	0.000122411	0.000103083	HESX1/SMAD5/IRF1/JUN/TEF/CLOCK/ARNTL2/ZBTB7A/Pou5f3/MAX/ZBTB17/GLI1	12
GO:0070888	MF	GO:0070888	E-box binding	0.133333	15/1927	5.795e-05	0.00042348	0.000356615	ZEB1/CLOCK/ARNTL2/MAX	4
GO:0001227	MF	GO:0001227	DNA-binding transcription repressor activity, RNA polymerase II-specific	0.133333	21/1927	0.000238045	0.00161531	0.00136026	HESX1/SMAD5/MAX/ZBTB17	4
GO:0001217	MF	GO:0001217	DNA-binding transcription repressor activity	0.133333	22/1927	0.000287799	0.00182273	0.00153493	HESX1/SMAD5/MAX/ZBTB17	4
GO:0003712	MF	GO:0003712	transcription coregulator activity	0.166667	45/1927	0.000510598	0.00303167	0.00255299	MYSM1/LDB1/NCOA7/CBFA2T3/SETD3	5
GO:0042393	MF	GO:0042393	histone binding	0.1	22/1927	0.00429701	0.0240127	0.0202212	MYSM1/JAK2/SGF29	3
GO:0003713	MF	GO:0003713	transcription coactivator activity	0.1	23/1927	0.00488987	0.0258077	0.0217328	MYSM1/NCOA7/SETD3	3
KEGG
	ID	Description	GeneRatio	BgRatio	pvalue	p.adjust	qvalue	geneID	Count
gga04625	gga04625	C-type lectin receptor signaling pathway	0.175	87/5041	4.20054e-06	0.000210027	0.000159178	NFATC3/NFKB2/IRF1/JUN/RAF1/MDM2/NFKBIA	7
gga04920	gga04920	Adipocytokine signaling pathway	0.1	64/5041	0.001533	0.0383249	0.0290463	JAK2/NFKBIA/NFKBIB/NFKBIE	4
gga05164	gga05164	Influenza A	0.125	139/5041	0.00448942	0.0718476	0.0544529	RAF1/CREBBP/JAK2/NFKBIA/NFKBIB	5
gga04350	gga04350	TGF-beta signaling pathway	0.1	92/5041	0.00574781	0.0718476	0.0544529	SMAD5/SP1/SMURF2/CREBBP	4
