# Supplementary material for: Gene Co-Expression Network Analysis Reveals the Hub Genes and Key Pathways Associated with Resistance to Salmonella Enteritidis Colonization in Chicken
Source: Int J Mol Sci. 2023 Mar 2;24(5):4824. doi: 10.3390/ijms24054824 (PMC10003191; doi:10.3390/ijms24054824)
Supplement: Supplementary file 1 [file ijms-24-04824-s001.zip › Supplementary Table S5.xlsx]

## Sheet: Sheet1
Modules		ONTOLOGY	ID	Description	GeneRatio	BgRatio	pvalue	p.adjust	qvalue	geneID	Count
Blue	GO:0070647	BP	GO:0070647	protein modification by small protein conjugation or removal	31/356	92/2090	5.3293e-05	0.0442624	0.0442624	UBE2F/HDAC4/URM1/USP47/TNFAIP1/WDR48/USP7/FBXO18/CRBN/USP13/DTL/G2E3/RNF13/ATXN3/MYSM1/USP37/RPS15/HACE1/UFL1/LTN1/USP48/BAG5/AKTIP/YOD1/UVSSA/UBA52/HSF2/NAE1/CBLL1/OTUD6A/KLHL15	31
	GO:0016579	BP	GO:0016579	protein deubiquitination	10/356	16/2090	5.55362e-05	0.0442624	0.0442624	USP47/WDR48/USP7/USP13/ATXN3/MYSM1/USP37/USP48/YOD1/OTUD6A	10
	GO:0004843	MF	GO:0004843	thiol-dependent deubiquitinase	9/314	14/1927	6.81237e-05	0.00953732	0.00914292	USP47/USP7/USP13/ATXN3/MYSM1/USP37/USP48/YOD1/OTUD6A	9
	GO:0008242	MF	GO:0008242	omega peptidase activity	9/314	14/1927	6.81237e-05	0.00953732	0.00914292	USP47/USP7/USP13/ATXN3/MYSM1/USP37/USP48/YOD1/OTUD6A	9
	GO:0101005	MF	GO:0101005	deubiquitinase activity	9/314	15/1927	0.000146095	0.0136356	0.0130717	USP47/USP7/USP13/ATXN3/MYSM1/USP37/USP48/YOD1/OTUD6A	9
	GO:0019783	MF	GO:0019783	ubiquitin-like protein-specific protease activity	9/314	16/1927	0.000286524	0.0200567	0.0192273	USP47/USP7/USP13/ATXN3/MYSM1/USP37/USP48/YOD1/OTUD6A	9
		ID	Description	GeneRatio	BgRatio	pvalue	p.adjust	qvalue	geneID	Count
	gga00190	gga00190	Oxidative phosphorylation	53/960	117/5041	4.91091e-11	7.46459e-09	7.13375e-09	NDUFA7/UQCR11/ATP5G1/NDUFB6/ATP6V0A2/NDUFS5/NDUFA10/NDUFB10/NDUFB8/COX4I1/NDUFAB1/ATP5L/COX6A1/COX7B/ATP5H/UQCR10/NDUFB3/NDUFA1/NDUFA5/NDUFB5/ATP6V0C/NDUFS7/ATP6V0B/NDUFS6/COX5A/COX17/ATP5J/COX7A2/UQCRHL/NDUFA11/NDUFV3/NDUFB4/NDUFB1/NDUFC2/ATP5G2/LHPP/NDUFB2/ATP5D/ATP5J2/LOC107049545/NDUFA6/COX6C/NDUFV2/NDUFB7/ATP5B/NDUFA13/NDUFS8/NDUFA2/SDHB/NDUFS2/ATP5O/NDUFB9/ATP5E	53
	gga03010	gga03010	Ribosome	51/960	121/5041	2.65627e-09	2.01876e-07	1.92929e-07	RPL9/RPL36/RPL22/RPL38/RPL23/RPL19/MRPL17/RPL26L1/MRPL21/RPS14/RPS24/RPL36A/RPS21/RPL27A/RPL13/MRPL23/RPL35A/RPS25/MRPL2/RPL39L/RPL22L1/RPS8/RPL3/RPS29/RPS15/RPS7/MRPL30/RPL31/MRPL35/MRPS18C/RPS16/RPL29/RPL21/RPL32/MRPL16/RPL30/MRPL24/RPL34/RPL7/MRPL34/RPS27/UBA52/MRPS12/RPL14/MRPL12/MRPL33/RPS28/MRPS16/RPS15A/MRPS21/RPS27L	51
	gga04141	gga04141	Protein processing in endoplasmic reticulum	53/960	155/5041	4.20605e-06	0.000213106	0.000203661	HSPA5/HERPUD1/UGGT1/AMFR/ERN1/NPLOC4/FBXO44/SEC24C/RPN1/MAPK8/SEC24A/HSPA8/PDIA3/NFE2L2/EIF2AK4/SEC23A/HSPA4L/SEL1L/ATXN3/STT3B/SEC24D/ATF4/CKAP4/TXNDC5/MAP3K5/MAN1A1/SEC63/EIF2AK3/MBTPS2/UGGT2/DNAJC3/HSPH1/UBE2D1/DNAJA1/DNAJB2/DDIT3/CANX/HSP90AA1/LMAN2/HSP90B1/BCAP31/DNAJC5/SEC24B/CUL1/MAN1B1/YOD1/SEC61G/ERO1B/CALR/MAN1A2/PDIA4/MOGS/DNAJB1	53
		ONTOLOGY	ID	Description	GeneRatio	BgRatio	pvalue	p.adjust	qvalue	geneID	Count
Brown	GO:0007155	BP	GO:0007155	cell adhesion	37/196	163/2090	8.16519e-08	6.0994e-05	5.49646e-05	MMP2/VCL/CDH13/PODXL/NRP1/ITGB1/TGFB1I1/RELN/TENM1/ITGA8/NRXN1/NRCAM/CNTN1/GREM1/PPP1CB/PPP1R12A/THBS2/KITLG/IGF1/CDH6/CDH7/ITGA1/COL8A1/EPHA3/BVES/EPHA7/HAPLN1/COL12A1/DSCAM/NRXN3/CTNNA2/CDH5/KIT/CDH11/TNC/CAV1/TWSG1	37
	GO:0022610	BP	GO:0022610	biological adhesion	37/196	163/2090	8.16519e-08	6.0994e-05	5.49646e-05	MMP2/VCL/CDH13/PODXL/NRP1/ITGB1/TGFB1I1/RELN/TENM1/ITGA8/NRXN1/NRCAM/CNTN1/GREM1/PPP1CB/PPP1R12A/THBS2/KITLG/IGF1/CDH6/CDH7/ITGA1/COL8A1/EPHA3/BVES/EPHA7/HAPLN1/COL12A1/DSCAM/NRXN3/CTNNA2/CDH5/KIT/CDH11/TNC/CAV1/TWSG1	37
	GO:0048646	BP	GO:0048646	anatomical structure formation involved in morphogenesis	29/196	141/2090	2.0744e-05	0.0103305	0.00930934	LOXL2/HS6ST1/MMP2/NFIB/CDH13/PODXL/MYH11/NRP1/NRXN1/GREM1/ACTA1/THBS2/AGTPBP1/IGF1/CDH7/TBPL1/COL8A1/COL12A1/DSCAM/FLT1/NRXN3/CTNNA2/CSRP2/CDH5/CALD1/RECK/PTN/SPRY1/TWSG1	29
	GO:0009653	BP	GO:0009653	anatomical structure morphogenesis	51/196	322/2090	3.5967e-05	0.0134337	0.0121057	LOXL2/GJC3/HS6ST1/MMP2/ALDH1A2/VCL/NFIB/CDH13/CDX1/ACTA2/PODXL/MYH11/SEMA3A/NRP1/TGFB1I1/RELN/NRXN1/GREM1/P2RY1/ACTA1/THBS2/EPHA5/NTRK2/AGTPBP1/IGF1/CDH6/CDH7/TBPL1/EPHB6/COL8A1/PLAG1/BVES/EPHA7/COL12A1/DSCAM/FLT1/PTHLH/INSIG1/NRXN3/CTNNA2/CSRP2/LMBR1/CA2/CDH5/CALD1/RECK/KIT/PTN/SPRY1/TWSG1/NTF3	51
	GO:0072359	BP	GO:0072359	circulatory system development	26/196	126/2090	5.50388e-05	0.0154032	0.0138806	LOXL2/GJC3/HS6ST1/SMYD4/UBIAD1/MMP2/ALDH1A2/CDH13/MYH11/NRP1/NRXN1/GREM1/THBS2/NTRK2/IGF1/PDLIM3/COL8A1/BVES/FLT1/NRXN3/CDH5/CALD1/RECK/KIT/PDLIM4/PTN	26
	GO:0035239	BP	GO:0035239	tube morphogenesis	21/196	93/2090	7.72721e-05	0.0154032	0.0138806	LOXL2/GJC3/HS6ST1/ALDH1A2/NFIB/CDH13/PODXL/NRP1/NRXN1/GREM1/THBS2/NTRK2/CDH7/COL8A1/BVES/EPHA7/FLT1/NRXN3/CDH5/CALD1/RECK	21
	GO:0090130	BP	GO:0090130	tissue migration	11/196	32/2090	8.26258e-05	0.0154032	0.0138806	LOXL2/CDH13/ACTA2/NRP1/TGFB1I1/GREM1/BVES/ARF6/CDH5/KIT/PTN	11
	GO:0040011	BP	GO:0040011	locomotion	33/196	182/2090	8.28223e-05	0.0154032	0.0138806	LOXL2/VCL/NFIB/CDH13/PODXL/SEMA3A/NRP1/ITGB1/TGFB1I1/SLC9A3R1/RELN/PDGFC/GREM1/CFL2/KITLG/EPHA5/NTRK2/IGF1/CDH7/EPHB6/EPHA3/BVES/EPHA7/DSCAM/FLT1/ARF6/CTNNA2/CDH5/COLEC10/RECK/KIT/MSTN/PTN	33
	GO:0001944	BP	GO:0001944	vasculature development	18/196	74/2090	9.27904e-05	0.0154032	0.0138806	LOXL2/GJC3/HS6ST1/MMP2/CDH13/NRP1/NRXN1/GREM1/THBS2/NTRK2/COL8A1/BVES/FLT1/NRXN3/CDH5/CALD1/RECK/KIT	18
	GO:0001568	BP	GO:0001568	blood vessel development	17/196	69/2090	0.000123588	0.0184641	0.0166389	LOXL2/GJC3/HS6ST1/MMP2/CDH13/NRP1/NRXN1/GREM1/THBS2/NTRK2/COL8A1/BVES/FLT1/NRXN3/CDH5/CALD1/RECK	17
	GO:0035295	BP	GO:0035295	tube development	23/196	113/2090	0.000191833	0.0241124	0.0217288	LOXL2/GJC3/HS6ST1/ALDH1A2/NFIB/CDH13/PODXL/NRP1/NRXN1/GREM1/THBS2/NTRK2/CDH7/COL8A1/BVES/EPHA7/FLT1/NRXN3/CDH5/CALD1/RECK/KIT/PTN	23
	GO:0018193	BP	GO:0018193	peptidyl-amino acid modification	29/196	159/2090	0.000213005	0.0241124	0.0217288	LOXL2/P4HA1/P4HA2/RELN/TENM1/ING3/GREM1/GCG/KITLG/EPHA5/NTRK2/AGTPBP1/IGF1/EOGT/EED/EPHB6/GHR/EPHA3/AFAP1/EPHA7/TXN/FLT1/CSNK1G1/GCSH/CRTAP/KIT/DSTYK/CAV1/NTF3	29
	GO:0007169	BP	GO:0007169	transmembrane receptor protein tyrosine kinase signaling pathway	19/196	86/2090	0.000235475	0.0241124	0.0217288	CDH13/NRP1/SLC9A3R1/PDGFC/GREM1/EPHA5/NTRK2/IGF1/EPHB6/GHR/ITGA1/EPHA3/EPHA7/FLT1/EFNB1/KIT/MSTN/SPRY1/NTF3	19
	GO:0090132	BP	GO:0090132	epithelium migration	10/196	30/2090	0.000236098	0.0241124	0.0217288	LOXL2/CDH13/NRP1/TGFB1I1/GREM1/BVES/ARF6/CDH5/KIT/PTN	10
	GO:0010562	BP	GO:0010562	positive regulation of phosphorus metabolic process	22/196	108/2090	0.000263751	0.0241124	0.0217288	RELN/TENM1/PDGFC/GREM1/PPP1R12A/GCG/KITLG/EPHA5/NTRK2/IGF1/EPHB6/GHR/ITGA1/EPHA7/TXN/DSCAM/FLT1/CDH5/KIT/MSTN/TWSG1/NTF3	22
	GO:0045937	BP	GO:0045937	positive regulation of phosphate metabolic process	22/196	108/2090	0.000263751	0.0241124	0.0217288	RELN/TENM1/PDGFC/GREM1/PPP1R12A/GCG/KITLG/EPHA5/NTRK2/IGF1/EPHB6/GHR/ITGA1/EPHA7/TXN/DSCAM/FLT1/CDH5/KIT/MSTN/TWSG1/NTF3	22
	GO:0120031	BP	GO:0120031	plasma membrane bounded cell projection assembly	11/196	36/2090	0.000274371	0.0241124	0.0217288	GSN/SEPTIN2L/VCL/CDH13/PODXL/NRP1/TMEM237/TENM1/ARF6/KIT/MSTN	11
	GO:0048514	BP	GO:0048514	blood vessel morphogenesis	16/196	67/2090	0.000291601	0.0242029	0.0218104	LOXL2/GJC3/HS6ST1/CDH13/NRP1/NRXN1/GREM1/THBS2/NTRK2/COL8A1/BVES/FLT1/NRXN3/CDH5/CALD1/RECK	16
	GO:0006468	BP	GO:0006468	protein phosphorylation	31/196	179/2090	0.000338412	0.0266099	0.0239794	MMP2/SLC9A3R1/RELN/TENM1/PDGFC/GREM1/GCG/KITLG/EPHA5/MYLK/NTRK2/IGF1/EPHB6/GHR/EPHA3/AFAP1/EPHA7/TXN/FLT1/POMK/CSNK1G1/CDH5/YAP1/KIT/MSTN/DSTYK/SPRY1/CAV1/TWSG1/PKIA/NTF3	31
	GO:0030031	BP	GO:0030031	cell projection assembly	11/196	37/2090	0.000358836	0.0268051	0.0241553	GSN/SEPTIN2L/VCL/CDH13/PODXL/NRP1/TMEM237/TENM1/ARF6/KIT/MSTN	11
	GO:0018108	BP	GO:0018108	peptidyl-tyrosine phosphorylation	15/196	63/2090	0.000469667	0.0334135	0.0301105	RELN/GREM1/KITLG/EPHA5/NTRK2/IGF1/EPHB6/GHR/EPHA3/AFAP1/EPHA7/FLT1/KIT/DSTYK/CAV1	15
	GO:0042325	BP	GO:0042325	regulation of phosphorylation	25/196	136/2090	0.000536298	0.0361808	0.0326043	MMP2/SLC9A3R1/RELN/TENM1/PDGFC/GREM1/GCG/KITLG/EPHA5/NTRK2/IGF1/EPHB6/GHR/EPHA7/TXN/DSCAM/FLT1/CDH5/KIT/MSTN/SPRY1/CAV1/TWSG1/PKIA/NTF3	25
	GO:0018212	BP	GO:0018212	peptidyl-tyrosine modification	15/196	64/2090	0.000563303	0.0361808	0.0326043	RELN/GREM1/KITLG/EPHA5/NTRK2/IGF1/EPHB6/GHR/EPHA3/AFAP1/EPHA7/FLT1/KIT/DSTYK/CAV1	15
	GO:0048013	BP	GO:0048013	ephrin receptor signaling pathway	6/196	13/2090	0.000617252	0.0361808	0.0326043	EPHA5/NTRK2/EPHB6/EPHA3/EPHA7/EFNB1	6
	GO:0120036	BP	GO:0120036	plasma membrane bounded cell projection organization	26/196	145/2090	0.000617518	0.0361808	0.0326043	GSN/SEPTIN2L/VCL/NFIB/CDH13/PODXL/SEMA3A/NRP1/RELN/TMEM237/TENM1/CNTN1/EPHA5/NTRK2/NCS1/EPHB6/EPHA3/EPHA7/DSCAM/ARF6/CTNNA2/KIT/MSTN/STMN2/PTN/NTF3	26
	GO:0043549	BP	GO:0043549	regulation of kinase activity	18/196	86/2090	0.000698063	0.0361808	0.0326043	SLC9A3R1/RELN/TENM1/PDGFC/GREM1/GCG/KITLG/EPHA5/NTRK2/IGF1/EPHB6/EPHA7/FLT1/KIT/MSTN/SPRY1/CAV1/PKIA	18
	GO:0019220	BP	GO:0019220	regulation of phosphate metabolic process	27/196	154/2090	0.000698269	0.0361808	0.0326043	MMP2/SLC9A3R1/RELN/TENM1/PDGFC/GREM1/PPP1R12A/GCG/KITLG/EPHA5/NTRK2/IGF1/EPHB6/GHR/ITGA1/EPHA7/TXN/DSCAM/FLT1/CDH5/KIT/MSTN/SPRY1/CAV1/TWSG1/PKIA/NTF3	27
	GO:0051174	BP	GO:0051174	regulation of phosphorus metabolic process	27/196	154/2090	0.000698269	0.0361808	0.0326043	MMP2/SLC9A3R1/RELN/TENM1/PDGFC/GREM1/PPP1R12A/GCG/KITLG/EPHA5/NTRK2/IGF1/EPHB6/GHR/ITGA1/EPHA7/TXN/DSCAM/FLT1/CDH5/KIT/MSTN/SPRY1/CAV1/TWSG1/PKIA/NTF3	27
	GO:0098609	BP	GO:0098609	cell-cell adhesion	17/196	79/2090	0.000704385	0.0361808	0.0326043	VCL/CDH13/PODXL/TENM1/NRCAM/IGF1/CDH6/CDH7/BVES/EPHA7/DSCAM/CTNNA2/CDH5/KIT/CDH11/CAV1/TWSG1	17
	GO:0048468	BP	GO:0048468	cell development	37/196	237/2090	0.000742177	0.0361808	0.0326043	GJC3/HS6ST1/UBIAD1/VCL/NFIB/MYH11/SEMA3A/NRP1/TGFB1I1/RELN/TENM1/NRCAM/CNTN1/DAAM2/ACTA1/KITLG/EPHA5/NTRK2/NCS1/IGF1/TBPL1/EPHB6/EPHA3/PLAG1/BVES/EPHA7/DSCAM/PTHLH/ARF6/CTNNA2/CSRP2/CDH5/RECK/KIT/STMN2/PTN/NTF3	37
	GO:0031401	BP	GO:0031401	positive regulation of protein modification process	20/196	101/2090	0.00075074	0.0361808	0.0326043	ARNTL/RELN/TENM1/PDGFC/GREM1/PPP1R12A/GCG/KITLG/NTRK2/CRY1/IGF1/GHR/ITGA1/EPHA7/TXN/CDH5/KIT/MSTN/TWSG1/NTF3	20
	GO:0010631	BP	GO:0010631	epithelial cell migration	9/196	29/2090	0.000886365	0.0406801	0.0366588	LOXL2/CDH13/NRP1/TGFB1I1/GREM1/ARF6/CDH5/KIT/PTN	9
	GO:0030030	BP	GO:0030030	cell projection organization	26/196	149/2090	0.000952667	0.0406801	0.0366588	GSN/SEPTIN2L/VCL/NFIB/CDH13/PODXL/SEMA3A/NRP1/RELN/TMEM237/TENM1/CNTN1/EPHA5/NTRK2/NCS1/EPHB6/EPHA3/EPHA7/DSCAM/ARF6/CTNNA2/KIT/MSTN/STMN2/PTN/NTF3	26
	GO:0031399	BP	GO:0031399	regulation of protein modification process	26/196	149/2090	0.000952667	0.0406801	0.0366588	MMP2/N4BP1/ARNTL/SLC9A3R1/RELN/TENM1/PDGFC/GREM1/PPP1R12A/GCG/KITLG/NTRK2/CRY1/IGF1/GHR/ITGA1/EPHA7/TXN/CDH5/KIT/MSTN/SPRY1/CAV1/TWSG1/PKIA/NTF3	26
	GO:0032268	BP	GO:0032268	regulation of cellular protein metabolic process	37/196	240/2090	0.000953013	0.0406801	0.0366588	PAIP2B/MMP2/N4BP1/ARNTL/WFDC1/PABIR3/DNAJB6/SLC9A3R1/RELN/TENM1/PDGFC/GREM1/PPP1R12A/CYCS/GCG/KITLG/QKI/NTRK2/CRY1/IGF1/GHR/ITGA1/PELO/EPHA7/TXN/TIMP3/CDH5/CRIM1/CELF2/RECK/KIT/MSTN/SPRY1/CAV1/TWSG1/PKIA/NTF3	37
	GO:0071695	BP	GO:0071695	anatomical structure maturation	7/196	19/2090	0.00108602	0.0450144	0.0405647	MMP2/NRCAM/GREM1/IGF1/CDH5/PHOSPHO1/RECK	7
	GO:0006464	BP	GO:0006464	cellular protein modification process	56/196	413/2090	0.00115939	0.0450144	0.0405647	LOXL2/MIB2/MMP2/N4BP1/P4HA1/ARNTL/PGP/KLHL9/P4HA2/MTMR8/SLC9A3R1/RELN/DDB2/TENM1/ING3/PDGFC/GREM1/RCOR3/PPP1CB/PPP1R12A/KLHL7/GCG/KITLG/EPHA5/MYLK/PCMT1/WDSUB1/NTRK2/AGTPBP1/CRY1/IGF1/RPRD1A/EOGT/EED/EPHB6/GHR/ITGA1/EPHA3/AFAP1/EPHA7/TXN/FLT1/POMK/CSNK1G1/CDH5/GCSH/CRTAP/YAP1/KIT/MSTN/DSTYK/SPRY1/CAV1/TWSG1/PKIA/NTF3	56
	GO:0036211	BP	GO:0036211	protein modification process	56/196	413/2090	0.00115939	0.0450144	0.0405647	LOXL2/MIB2/MMP2/N4BP1/P4HA1/ARNTL/PGP/KLHL9/P4HA2/MTMR8/SLC9A3R1/RELN/DDB2/TENM1/ING3/PDGFC/GREM1/RCOR3/PPP1CB/PPP1R12A/KLHL7/GCG/KITLG/EPHA5/MYLK/PCMT1/WDSUB1/NTRK2/AGTPBP1/CRY1/IGF1/RPRD1A/EOGT/EED/EPHB6/GHR/ITGA1/EPHA3/AFAP1/EPHA7/TXN/FLT1/POMK/CSNK1G1/CDH5/GCSH/CRTAP/YAP1/KIT/MSTN/DSTYK/SPRY1/CAV1/TWSG1/PKIA/NTF3	56
	GO:0001932	BP	GO:0001932	regulation of protein phosphorylation	21/196	112/2090	0.00117507	0.0450144	0.0405647	MMP2/SLC9A3R1/RELN/TENM1/PDGFC/GREM1/GCG/KITLG/NTRK2/IGF1/GHR/EPHA7/TXN/CDH5/KIT/MSTN/SPRY1/CAV1/TWSG1/PKIA/NTF3	21
	GO:0051246	BP	GO:0051246	regulation of protein metabolic process	38/196	252/2090	0.00124985	0.0457243	0.0412044	OAZ1/PAIP2B/MMP2/N4BP1/ARNTL/WFDC1/PABIR3/DNAJB6/SLC9A3R1/RELN/TENM1/PDGFC/GREM1/PPP1R12A/CYCS/GCG/KITLG/QKI/NTRK2/CRY1/IGF1/GHR/ITGA1/PELO/EPHA7/TXN/TIMP3/CDH5/CRIM1/CELF2/RECK/KIT/MSTN/SPRY1/CAV1/TWSG1/PKIA/NTF3	38
	GO:0006928	BP	GO:0006928	movement of cell or subcellular component	32/196	201/2090	0.0012685	0.0457243	0.0412044	LOXL2/MYO1C/VCL/NFIB/CDH13/PODXL/SEMA3A/NRP1/ITGB1/TGFB1I1/SLC9A3R1/RELN/PDGFC/GREM1/CFL2/KITLG/EPHA5/NTRK2/IGF1/CDH7/EPHB6/EPHA3/EPHA7/DSCAM/FLT1/ARF6/CTNNA2/CDH5/RECK/KIT/MSTN/PTN	32
	GO:0034330	BP	GO:0034330	cell junction organization	15/196	69/2090	0.00130724	0.0457243	0.0412044	GJC3/MMP2/VCL/SEMA3A/GREM1/NTRK2/CDH6/CDH7/EPHA3/EPHA7/DSCAM/ARF6/CTNNA2/GABRB3/CDH5	15
	GO:0042327	BP	GO:0042327	positive regulation of phosphorylation	19/196	98/2090	0.00133772	0.0457243	0.0412044	RELN/TENM1/PDGFC/GREM1/GCG/KITLG/EPHA5/NTRK2/IGF1/EPHB6/GHR/EPHA7/TXN/DSCAM/FLT1/KIT/MSTN/TWSG1/NTF3	19
	GO:0034329	BP	GO:0034329	cell junction assembly	12/196	49/2090	0.00134663	0.0457243	0.0412044	GJC3/MMP2/VCL/GREM1/NTRK2/CDH6/CDH7/EPHA3/EPHA7/DSCAM/GABRB3/CDH5	12
	GO:0001525	BP	GO:0001525	angiogenesis	13/196	56/2090	0.00145526	0.0479286	0.0431907	LOXL2/HS6ST1/CDH13/NRP1/NRXN1/GREM1/THBS2/COL8A1/FLT1/NRXN3/CDH5/CALD1/RECK	13
	GO:0030036	BP	GO:0030036	actin cytoskeleton organization	19/196	99/2090	0.00151968	0.0479286	0.0431907	GSN/MYO1C/TPM1/DNAJB6/MYH11/TENM1/CFL2/DAAM2/ACTA1/EPHA5/PDLIM3/EPHA3/DMD/FAM49A/ARF6/CSRP2/CALD1/KIT/PDLIM4	19
	GO:0021700	BP	GO:0021700	developmental maturation	7/196	20/2090	0.00153987	0.0479286	0.0431907	MMP2/NRCAM/GREM1/IGF1/CDH5/PHOSPHO1/RECK	7
	GO:0043542	BP	GO:0043542	endothelial cell migration	7/196	20/2090	0.00153987	0.0479286	0.0431907	LOXL2/CDH13/NRP1/TGFB1I1/GREM1/CDH5/PTN	7
	GO:0005912	CC	GO:0005912	adherens junction	8/200	16/2158	3.18308e-05	0.00649732	0.0054461	VCL/CDH6/PDLIM3/CDH7/CTNNA2/CDH5/PDLIM4/TNS1	8
	GO:0030054	CC	GO:0030054	cell junction	34/200	191/2158	7.53442e-05	0.00649732	0.0054461	GJC3/SEPTIN2L/CHRNA5/KCNMA1/VCL/SEMA3A/NRP1/ITGB1/TGFB1I1/DDB2/PSEN2/NRCAM/NTRK2/NCS1/CHRM2/CDH6/CACNA1C/PDLIM3/CDH7/BVES/EPHA7/HAPLN1/DSCAM/DMD/CTNNA2/GABRB3/CDH5/KIT/PDLIM4/CDH11/TNS1/DSTYK/CAV1/NTF3	34
	GO:0098590	CC	GO:0098590	plasma membrane region	23/200	109/2158	9.02406e-05	0.00649732	0.0054461	SEPTIN2L/MYO1C/CHRNA5/KCNMA1/CDH13/PODXL/ITGB1/SLC9A3R1/PSEN2/VLDLR/AKR1A1/MYLK/CRY1/CHRM2/CACNA1C/BVES/DMD/ARF6/GABRB3/FZD6/PDLIM4/DSTYK/CAV1	23
	GO:0005886	CC	GO:0005886	plasma membrane	66/200	480/2158	0.000153045	0.00705215	0.00591116	GJC3/SEPTIN2L/CHMP4B/KCTD7/MYO1C/CHRNA5/TPM1/MMP2/KCNMA1/VCL/CDH13/TMC3/PODXL/NRP1/ITGB1/TGFB1I1/SLC9A3R1/TENM1/ATP1B4/ITGA8/PSEN2/PDGFC/NRCAM/CNTN1/PPP1CB/VLDLR/AKR1A1/P2RY1/FAM126A/KITLG/EPHA5/MYLK/NTRK2/CRY1/NCS1/IGF1/CHRM2/CDH6/CACNA1C/SLC7A2/CDH7/EPHB6/GHR/EPHA3/BVES/AFAP1/EPHA7/DSCAM/DMD/FLT1/ARF6/CTNNA2/CNTFR/GABRB3/LMBR1/FZD6/CA2/CSNK1G1/CDH5/RECK/KIT/PDLIM4/CDH11/PTN/DSTYK/CAV1	66
	GO:0005911	CC	GO:0005911	cell-cell junction	13/200	46/2158	0.000163244	0.00705215	0.00591116	GJC3/VCL/NRCAM/CDH6/PDLIM3/CDH7/BVES/CTNNA2/CDH5/KIT/PDLIM4/CDH11/TNS1	13
	GO:0070161	CC	GO:0070161	anchoring junction	16/200	67/2158	0.000255951	0.00921422	0.00772342	GJC3/VCL/ITGB1/TGFB1I1/NRCAM/CDH6/PDLIM3/CDH7/BVES/CTNNA2/CDH5/KIT/PDLIM4/CDH11/TNS1/CAV1	16
	GO:0005887	CC	GO:0005887	integral component of plasma membrane	24/200	126/2158	0.000340643	0.0105113	0.00881062	CHRNA5/TMC3/ITGB1/TENM1/ATP1B4/ITGA8/PSEN2/NRCAM/P2RY1/EPHA5/NTRK2/CHRM2/CACNA1C/EPHB6/EPHA3/BVES/EPHA7/DSCAM/FLT1/CNTFR/GABRB3/LMBR1/KIT/CAV1	24
	GO:0031226	CC	GO:0031226	intrinsic component of plasma membrane	24/200	133/2158	0.000786386	0.0195647	0.0163993	CHRNA5/TMC3/ITGB1/TENM1/ATP1B4/ITGA8/PSEN2/NRCAM/P2RY1/EPHA5/NTRK2/CHRM2/CACNA1C/EPHB6/EPHA3/BVES/EPHA7/DSCAM/FLT1/CNTFR/GABRB3/LMBR1/KIT/CAV1	24
	GO:0030016	CC	GO:0030016	myofibril	12/200	47/2158	0.000815197	0.0195647	0.0163993	TNNC1/MMP2/VCL/DNAJB6/MYH11/PSEN2/PPP1R12A/ACTA1/PDLIM3/CSRP2/CALD1/PDLIM4	12
	GO:0032432	CC	GO:0032432	actin filament bundle	7/200	19/2158	0.00101318	0.0218846	0.0183438	VCL/TGFB1I1/ACTA1/MYLK/PDLIM3/DMD/PDLIM4	7
	GO:0043292	CC	GO:0043292	contractile fiber	12/200	49/2158	0.0012178	0.0227406	0.0190613	TNNC1/MMP2/VCL/DNAJB6/MYH11/PSEN2/PPP1R12A/ACTA1/PDLIM3/CSRP2/CALD1/PDLIM4	12
	GO:0001725	CC	GO:0001725	stress fiber	6/200	15/2158	0.00144193	0.0227406	0.0190613	VCL/TGFB1I1/ACTA1/MYLK/PDLIM3/PDLIM4	6
	GO:0097517	CC	GO:0097517	contractile actin filament bundle	6/200	15/2158	0.00144193	0.0227406	0.0190613	VCL/TGFB1I1/ACTA1/MYLK/PDLIM3/PDLIM4	6
	GO:0098797	CC	GO:0098797	plasma membrane protein complex	12/200	50/2158	0.00147393	0.0227406	0.0190613	GJC3/CDH13/ITGB1/ATP1B4/ITGA8/IGF1/CDH6/CACNA1C/CDH7/CTNNA2/CNTFR/CDH5	12
	GO:0030017	CC	GO:0030017	sarcomere	10/200	38/2158	0.00174004	0.0250566	0.0210026	TNNC1/MMP2/VCL/DNAJB6/PSEN2/PPP1R12A/ACTA1/PDLIM3/CSRP2/PDLIM4	10
	GO:0030018	CC	GO:0030018	Z disc	7/200	21/2158	0.00198995	0.0260424	0.0218289	VCL/DNAJB6/PSEN2/PPP1R12A/PDLIM3/CSRP2/PDLIM4	7
	GO:0015629	CC	GO:0015629	actin cytoskeleton	16/200	80/2158	0.00204963	0.0260424	0.0218289	GSN/TNNC1/MYO1C/TPM1/VCL/MYH11/TGFB1I1/CFL2/ACTA1/MYLK/PDLIM3/MYL12A/DMD/CTNNA2/CALD1/PDLIM4	16
	GO:0120025	CC	GO:0120025	plasma membrane bounded cell projection	33/200	220/2158	0.00249437	0.0299324	0.0250896	SEPTIN2L/MYO1C/CHRNA5/NFIB/CDH13/ACTA2/PODXL/NRP1/ITGB1/SLC9A3R1/RELN/TMEM237/TENM1/PSEN2/P2RY1/FAM126A/KITLG/EPHA5/MYLK/NTRK2/CRY1/CHRM2/CACNA1C/PDLIM3/EPHB6/EPHA7/DSCAM/ARF6/CTNNA2/GABRB3/STMN2/PDLIM4/NTF3	33
	GO:0042995	CC	GO:0042995	cell projection	34/200	231/2158	0.0029615	0.0312986	0.0262347	SEPTIN2L/MYO1C/CHRNA5/NFIB/CDH13/ACTA2/PODXL/NRP1/ITGB1/SLC9A3R1/RELN/TMEM237/TENM1/PSEN2/P2RY1/FAM126A/KITLG/EPHA5/MYLK/NTRK2/CRY1/CHRM2/CACNA1C/PDLIM3/EPHB6/IMPG2/EPHA7/DSCAM/ARF6/CTNNA2/GABRB3/STMN2/PDLIM4/NTF3	34
	GO:0043235	CC	GO:0043235	receptor complex	12/200	54/2158	0.0029825	0.0312986	0.0262347	ARNTL/ITGB1/ITGA8/EPHA5/NTRK2/EPHB6/GHR/EPHA7/FLT1/CNTFR/GABRB3/KIT	12
	GO:0042641	CC	GO:0042641	actomyosin	6/200	17/2158	0.00304292	0.0312986	0.0262347	VCL/TGFB1I1/ACTA1/MYLK/PDLIM3/PDLIM4	6
	GO:0031674	CC	GO:0031674	I band	7/200	23/2158	0.0035723	0.0350735	0.0293989	VCL/DNAJB6/PSEN2/PPP1R12A/PDLIM3/CSRP2/PDLIM4	7
	GO:0030027	CC	GO:0030027	lamellipodium	8/200	30/2158	0.00461133	0.0432876	0.0362839	ACTA2/PODXL/ITGB1/KITLG/MYLK/PDLIM3/STMN2/PDLIM4	8
	GO:0031252	CC	GO:0031252	cell leading edge	11/200	50/2158	0.00480973	0.0432876	0.0362839	MYO1C/ACTA2/PODXL/ITGB1/SLC9A3R1/KITLG/MYLK/PDLIM3/ARF6/STMN2/PDLIM4	11
		ID	Description	GeneRatio	BgRatio	pvalue	p.adjust	qvalue	geneID	Count
	gga04510	gga04510	Focal adhesion	41/432	191/5041	1.6922e-08	2.35216e-06	2.22658e-06	PPP1R12B/PAK1/TLN2/MYLK3/TNN/LAMC1/VCL/PARVA/FLT4/ITGB1/TGFB1I1/VEGFRKDRL/MAP2K1/RELN/ITGA8/PAK5/PDGFC/THBS1/PPP1CB/PPP1R12A/THBS2/MYLK/EGF/IGF1/KDR/MYL12A/ITGA1/LAMA4/COL4A2/FLT1/PDGFD/VWF/ITGA9/CAV2/AKT3/COL4A1/MYL12B/TNC/IGF1R/DOCK1/CAV1	41
	gga04270	gga04270	Vascular smooth muscle contraction	30/432	122/5041	6.49538e-08	4.51429e-06	4.27328e-06	PPP1R12B/MYH10/ADRA1B/KCNMB1/CALCRL/PRKG1/MYLK3/KCNMA1/GUCY1B4/IRAG1/ACTA2/MYH11/MAP2K1/ITPR1/PLCB1/PRKCE/EDNRA/PPP1CB/KCNMB4/PPP1R12A/MYLK/CACNA1C/GUCY1A2/PRKACB/ADCY1/ADCY6/KCNMB2/CALD1/GUCY1A3/RAMP3	30
	gga04020	gga04020	Calcium signaling pathway	42/432	225/5041	7.11253e-07	3.29547e-05	3.11953e-05	ADRA1B/TNNC1/P2RX1/OXTR/ATP2B4/TACR2/MYLK3/HRH1/CAMK2G/FLT4/CACNA1G/VEGFRKDRL/HTR2B/FGF16/ITPR1/PLCB1/PTGFR/PDGFC/RYR3/EDNRA/SLC25A4/RYR2/MYLK/EGF/NTRK2/CHRM2/CACNA1C/KDR/HTR2A/FLT1/PDGFD/FGF6/P2RX6/PLN/PRKACB/FGFR4/CCKAR/ATP2B2/ADCY1/ATP2A2/PLCE1/ADRB2	42
	gga04261	gga04261	Adrenergic signaling in cardiomyocytes	27/432	127/5041	6.30822e-06	0.000219211	0.000207507	PPP2R2A/ADRA1B/TNNC1/TPM1/ATP2B4/CAMK2G/AGTR2/SCN4B/CACNA2D1/CACNB2/ATP1B4/PLCB1/PPP1CB/RYR2/PPP2R5E/CACNA1C/PLN/CACNG1/PRKACB/ATP2B2/MAPK13/ADCY1/ADCY6/ATP2A2/AKT3/CREB5/ADRB2	27
	gga04810	gga04810	Regulation of actin cytoskeleton	31/432	195/5041	0.000477206	0.0132663	0.0125581	PPP1R12B/PAK1/MYH10/GSN/ARPC3/MYLK3/ARPC1A/VCL/MYH11/ITGB1/TGFB1I1/MAP2K1/FGF16/ITGA8/PAK5/PDGFC/PPP1CB/CFL2/PPP1R12A/MYLK/EGF/CHRM2/MYL12A/ITGA1/PDGFD/FGF6/GNG12/FGFR4/ITGA9/MYL12B/DOCK1	31
	gga04540	gga04540	Gap junction	17/432	84/5041	0.000614501	0.0142359	0.0134759	PRKG1/GUCY1B4/TUBB1/HTR2B/MAP2K1/ITPR1/PLCB1/PDGFC/EGF/HTR2A/GUCY1A2/PDGFD/PRKACB/ADCY1/ADCY6/TUBB6/GUCY1A3	17
	gga04010	gga04010	MAPK signaling pathway	37/432	260/5041	0.00123861	0.0245953	0.0232822	MAP3K3/PAK1/TEK/FLT4/CACNA1G/VEGFRKDRL/MAP2K1/FGF16/CACNA2D1/CACNB2/PDGFC/KITLG/EGF/NTRK2/IGF1/CACNA1C/KDR/RASGRF2/FLT1/PDGFD/FGF6/RAPGEF2/GNG12/CACNG1/PRKACB/FGFR4/ANGPT1/MAPK13/AKT3/MAP3K20/DUSP3/ANGPT2/KIT/IGF1R/NFATC1/IL1R1/NTF3	37
		ONTOLOGY	ID	Description	GeneRatio	BgRatio	pvalue	p.adjust	qvalue	geneID	Count
Green	GO:0006954	BP	GO:0006954	inflammatory response	20/210	56/2090	1.36366e-07	0.000163261	0.000142918	STAT3/PIK3AP1/CD40LG/BCL6/VAMP7/REL/IL18/CEBPB/TLR2/IFNG/SLC11A1/NFKB1/ADORA2B/SYK/GATA3/LOC395551/TLR2A/SMAD3/HMGB1/EXFABP	20
	GO:0046649	BP	GO:0046649	lymphocyte activation	21/210	63/2090	2.55116e-07	0.000163261	0.000142918	LCK/STAT3/MAFB/CD40LG/BCL6/VAMP7/IL18/CEBPB/CD28/MSH6/IFNG/PRDX1/SLC11A1/FAM65B/SYK/GATA3/FGR/SMAD3/WNT4/HMGB1/LAT2	21
	GO:0002682	BP	GO:0002682	regulation of immune system process	28/210	103/2090	3.13562e-07	0.000163261	0.000142918	LCK/STAT3/MAFB/PIK3AP1/GATA2/CD40LG/BCL6/VAMP7/IL18/CEBPB/CD28/MSH6/TLR2/IFNG/SLC11A1/FAM65B/ADORA2B/FYN/SYK/GATA3/CSF3/TGFB1/FGR/INHBA/TLR2A/SMAD3/HMGB1/LAT2	28
	GO:0045321	BP	GO:0045321	leukocyte activation	22/210	72/2090	7.30609e-07	0.000285303	0.000249753	LCK/STAT3/MAFB/CD40LG/BCL6/VAMP7/IL18/CEBPB/CD28/MSH6/IFNG/PRDX1/SLC11A1/FAM65B/ADORA2B/SYK/GATA3/FGR/SMAD3/WNT4/HMGB1/LAT2	22
	GO:0050865	BP	GO:0050865	regulation of cell activation	16/210	43/2090	1.39751e-06	0.000436582	0.000382182	LCK/CD40LG/BCL6/VAMP7/IL18/CEBPB/CD28/MSH6/CAPN3/IFNG/FAM65B/ADORA2B/SYK/GATA3/FGR/HMGB1	16
	GO:0035556	BP	GO:0035556	intracellular signal transduction	44/210	221/2090	2.01974e-06	0.000525807	0.000460289	LCK/CISH/RHOT2/TNFAIP8L1/BTK/DUPD1/ARHGEF3/PIK3AP1/ARHGEF6/BCL6/TAOK3/ARHGAP19/REL/CEBPB/CHP1/PDCD4/MSH6/CAPN3/PRDX1/EPGN/FAM175A/NFKB1/BID/FAM65B/OPTN/ADORA2B/SYK/P2RY8/P2RY6/PIK3R5/NRAS/DOK3/SOCS3/FEM1B/DNAJC27/THOC5/GATA3/CSF3/FGR/LOC395551/SMAD3/DNMT1/HMGB1/LAT2	44
	GO:0001775	BP	GO:0001775	cell activation	23/210	84/2090	3.44378e-06	0.000698896	0.00061181	LCK/STAT3/MAFB/CD40LG/BCL6/VAMP7/IL18/CEBPB/CD28/MSH6/CAPN3/IFNG/PRDX1/SLC11A1/FAM65B/ADORA2B/SYK/GATA3/FGR/SMAD3/WNT4/HMGB1/LAT2	23
	GO:0050867	BP	GO:0050867	positive regulation of cell activation	14/210	36/2090	3.57949e-06	0.000698896	0.00061181	LCK/CD40LG/BCL6/VAMP7/IL18/CD28/MSH6/CAPN3/IFNG/ADORA2B/SYK/GATA3/FGR/HMGB1	14
	GO:0042110	BP	GO:0042110	T cell activation	16/210	47/2090	5.476e-06	0.000787316	0.000689214	LCK/STAT3/MAFB/CD40LG/BCL6/IL18/CEBPB/CD28/IFNG/SLC11A1/FAM65B/SYK/GATA3/SMAD3/WNT4/HMGB1	16
	GO:0002694	BP	GO:0002694	regulation of leukocyte activation	15/210	42/2090	5.53241e-06	0.000787316	0.000689214	LCK/CD40LG/BCL6/VAMP7/IL18/CEBPB/CD28/MSH6/IFNG/FAM65B/ADORA2B/SYK/GATA3/FGR/HMGB1	15
	GO:1903706	BP	GO:1903706	regulation of hemopoiesis	12/210	28/2090	5.54448e-06	0.000787316	0.000689214	STAT3/MAFB/GATA2/BCL6/CEBPB/IFNG/SYK/GATA3/CSF3/TGFB1/INHBA/HMGB1	12
	GO:0002263	BP	GO:0002263	cell activation involved in immune response	12/210	29/2090	8.62893e-06	0.00100132	0.000876554	STAT3/CD40LG/BCL6/VAMP7/IFNG/SLC11A1/ADORA2B/SYK/GATA3/FGR/HMGB1/LAT2	12
	GO:0002366	BP	GO:0002366	leukocyte activation involved in immune response	12/210	29/2090	8.62893e-06	0.00100132	0.000876554	STAT3/CD40LG/BCL6/VAMP7/IFNG/SLC11A1/ADORA2B/SYK/GATA3/FGR/HMGB1/LAT2	12
	GO:0002376	BP	GO:0002376	immune system process	42/210	218/2090	8.97473e-06	0.00100132	0.000876554	LCK/STAT3/MAFB/ORAI1/BTK/PIK3AP1/GATA2/CD40LG/BCL6/CD3E/VAMP7/REL/IL18/CEBPB/CD28/MSH6/TLR2/IFNG/PRDX1/SLC11A1/CTSV/IKZF1/FAM65B/ADORA2B/FYN/SYK/RAB6A/RSFR/SBDS/GATA3/CSF3/CSK/TGFB1/FGR/LOC395551/INHBA/TLR2A/SMAD3/WNT4/HMGB1/EXFABP/LAT2	42
	GO:0002696	BP	GO:0002696	positive regulation of leukocyte activation	13/210	35/2090	1.47166e-05	0.00153249	0.00134153	LCK/CD40LG/BCL6/VAMP7/IL18/CD28/MSH6/IFNG/ADORA2B/SYK/GATA3/FGR/HMGB1	13
	GO:0002684	BP	GO:0002684	positive regulation of immune system process	18/210	62/2090	1.77435e-05	0.00173221	0.00151637	LCK/CD40LG/BCL6/VAMP7/IL18/CD28/MSH6/IFNG/SLC11A1/FAM65B/ADORA2B/FYN/SYK/GATA3/TGFB1/FGR/HMGB1/LAT2	18
	GO:0045639	BP	GO:0045639	positive regulation of myeloid cell differentiation	7/210	11/2090	2.1824e-05	0.00200524	0.00175538	STAT3/GATA2/IFNG/CSF3/TGFB1/INHBA/HMGB1	7
	GO:0006955	BP	GO:0006955	immune response	30/210	140/2090	2.55506e-05	0.00221722	0.00194095	STAT3/ORAI1/BTK/PIK3AP1/CD40LG/BCL6/VAMP7/REL/IL18/CEBPB/CD28/TLR2/IFNG/PRDX1/SLC11A1/CTSV/ADORA2B/FYN/SYK/RSFR/GATA3/CSF3/CSK/FGR/LOC395551/TLR2A/SMAD3/HMGB1/EXFABP/LAT2	30
	GO:0002443	BP	GO:0002443	leukocyte mediated immunity	10/210	23/2090	3.01259e-05	0.00239468	0.0020963	CD40LG/BCL6/VAMP7/PRDX1/ADORA2B/SYK/GATA3/FGR/HMGB1/LAT2	10
	GO:0045637	BP	GO:0045637	regulation of myeloid cell differentiation	9/210	19/2090	3.32926e-05	0.00239468	0.0020963	STAT3/MAFB/GATA2/CEBPB/IFNG/CSF3/TGFB1/INHBA/HMGB1	9
	GO:1902105	BP	GO:1902105	regulation of leukocyte differentiation	9/210	19/2090	3.32926e-05	0.00239468	0.0020963	MAFB/GATA2/BCL6/CEBPB/IFNG/SYK/GATA3/TGFB1/HMGB1	9
	GO:1902531	BP	GO:1902531	regulation of intracellular signal transduction	29/210	135/2090	3.37279e-05	0.00239468	0.0020963	LCK/TNFAIP8L1/DUPD1/ARHGEF3/PIK3AP1/BCL6/TAOK3/ARHGAP19/CHP1/PDCD4/CAPN3/PRDX1/EPGN/BID/FAM65B/OPTN/ADORA2B/SYK/P2RY8/P2RY6/PIK3R5/FEM1B/DNAJC27/THOC5/GATA3/CSF3/FGR/LOC395551/HMGB1	29
	GO:0002250	BP	GO:0002250	adaptive immune response	12/210	33/2090	4.08821e-05	0.00277643	0.00243048	STAT3/ORAI1/BTK/CD40LG/BCL6/IFNG/SLC11A1/SYK/GATA3/CSK/HMGB1/LAT2	12
	GO:0002275	BP	GO:0002275	myeloid cell activation involved in immune response	7/210	12/2090	4.79309e-05	0.0031195	0.0027308	VAMP7/IFNG/ADORA2B/SYK/FGR/HMGB1/LAT2	7
	GO:0009966	BP	GO:0009966	regulation of signal transduction	46/210	264/2090	5.07711e-05	0.00317218	0.00277691	LCK/EYA3/CISH/STAT3/SFRP1/TNFAIP8L1/DRAXIN/DUPD1/AATF/ARHGEF3/PIK3AP1/GATA2/SMARCB1/BCL6/TAOK3/ARHGAP19/CHP1/PDCD4/CAPN3/IFNG/PRDX1/EPGN/NFKB1/BID/FAM65B/OPTN/ADORA2B/SYK/P2RY8/P2RY6/RGS20/PIK3R5/SOCS3/FEM1B/DNAJC27/THOC5/GATA3/CSF3/TGFB1/FGR/LOC395551/INHBA/SMAD3/WNT4/HMGB1/APCDD1	46
	GO:0048583	BP	GO:0048583	regulation of response to stimulus	56/210	345/2090	5.44807e-05	0.00327303	0.0028652	LCK/EYA3/CISH/STAT3/SFRP1/TNFAIP8L1/DRAXIN/DUPD1/AATF/ARHGEF3/PIK3AP1/GATA2/SMARCB1/BCL6/TAOK3/VAMP7/ARHGAP19/CEBPB/CHP1/CD28/PDCD4/CAPN3/TLR2/IFNG/PRDX1/EPGN/FAM175A/SLC11A1/NFKB1/BID/FAM65B/OPTN/ADORA2B/FYN/SYK/P2RY8/P2RY6/RGS20/PIK3R5/SOCS3/FEM1B/DNAJC27/THOC5/GATA3/CSF3/TGFB1/FGR/LOC395551/INHBA/TLR2A/SMAD3/H2AFY/WNT4/HMGB1/LAT2/APCDD1	56
	GO:0051249	BP	GO:0051249	regulation of lymphocyte activation	13/210	40/2090	7.57655e-05	0.00438318	0.00383701	LCK/CD40LG/BCL6/IL18/CEBPB/CD28/MSH6/IFNG/FAM65B/SYK/GATA3/FGR/HMGB1	13
	GO:0002252	BP	GO:0002252	immune effector process	13/210	41/2090	0.00010121	0.00564605	0.00494253	STAT3/CD40LG/BCL6/VAMP7/IFNG/PRDX1/SLC11A1/ADORA2B/SYK/GATA3/FGR/HMGB1/LAT2	13
	GO:0050776	BP	GO:0050776	regulation of immune response	16/210	58/2090	0.000105539	0.00568453	0.00497622	PIK3AP1/BCL6/VAMP7/CD28/TLR2/IFNG/SLC11A1/ADORA2B/FYN/SYK/GATA3/FGR/TLR2A/SMAD3/HMGB1/LAT2	16
	GO:0006952	BP	GO:0006952	defense response	25/210	120/2090	0.000209024	0.0108832	0.00952711	STAT3/BTK/PIK3AP1/CD40LG/BCL6/VAMP7/REL/IL18/CEBPB/TLR2/IFNG/PRDX1/SLC11A1/NFKB1/ADORA2B/FYN/SYK/RSFR/GATA3/FGR/LOC395551/TLR2A/SMAD3/HMGB1/EXFABP	25
	GO:0002274	BP	GO:0002274	myeloid leukocyte activation	8/210	19/2090	0.00025894	0.0130473	0.0114215	VAMP7/IFNG/SLC11A1/ADORA2B/SYK/FGR/HMGB1/LAT2	8
	GO:0002703	BP	GO:0002703	regulation of leukocyte mediated immunity	7/210	15/2090	0.00029863	0.0136522	0.0119511	BCL6/VAMP7/ADORA2B/SYK/GATA3/FGR/HMGB1	7
	GO:0032943	BP	GO:0032943	mononuclear cell proliferation	10/210	29/2090	0.000305907	0.0136522	0.0119511	CD40LG/BCL6/IL18/CEBPB/CD28/MSH6/SLC11A1/SYK/WNT4/HMGB1	10
	GO:0046651	BP	GO:0046651	lymphocyte proliferation	10/210	29/2090	0.000305907	0.0136522	0.0119511	CD40LG/BCL6/IL18/CEBPB/CD28/MSH6/SLC11A1/SYK/WNT4/HMGB1	10
	GO:0050863	BP	GO:0050863	regulation of T cell activation	10/210	29/2090	0.000305907	0.0136522	0.0119511	LCK/CD40LG/BCL6/CEBPB/CD28/IFNG/FAM65B/SYK/GATA3/HMGB1	10
	GO:0012501	BP	GO:0012501	programmed cell death	31/210	167/2090	0.000332722	0.0144364	0.0126376	LCK/EYA3/RHOT2/TOP2A/TNFAIP8L1/DRAXIN/SHISA5/AATF/GATA2/CD40LG/CTSD/BCL6/REL/CEBPB/MSH6/CAPN3/IFNG/BID/NAIF1/TNFAIP8/SOCS3/FEM1B/SIGMAR1/GATA3/CTSB/INHBA/SMAD3/ANP32B/WNT4/HMGB1/EXFABP	31
	GO:0008219	BP	GO:0008219	cell death	32/210	175/2090	0.000352239	0.0146631	0.012836	LCK/EYA3/RHOT2/TOP2A/TNFAIP8L1/DRAXIN/SHISA5/AATF/GATA2/CD40LG/CTSD/BCL6/REL/CEBPB/CHP1/MSH6/CAPN3/IFNG/BID/NAIF1/TNFAIP8/SOCS3/FEM1B/SIGMAR1/GATA3/CTSB/INHBA/SMAD3/ANP32B/WNT4/HMGB1/EXFABP	32
	GO:0002521	BP	GO:0002521	leukocyte differentiation	13/210	46/2090	0.000369499	0.0146631	0.012836	LCK/STAT3/MAFB/GATA2/CD40LG/BCL6/CEBPB/IFNG/SYK/GATA3/TGFB1/WNT4/HMGB1	13
	GO:0010646	BP	GO:0010646	regulation of cell communication	47/210	294/2090	0.00038205	0.0146631	0.012836	LCK/EYA3/CISH/STAT3/SFRP1/TNFAIP8L1/DRAXIN/DUPD1/AATF/ARHGEF3/PIK3AP1/GATA2/SMARCB1/BCL6/TAOK3/VAMP7/ARHGAP19/CHP1/PDCD4/CAPN3/IFNG/PRDX1/EPGN/NFKB1/BID/FAM65B/OPTN/ADORA2B/SYK/P2RY8/P2RY6/RGS20/PIK3R5/SOCS3/FEM1B/DNAJC27/THOC5/GATA3/CSF3/TGFB1/FGR/LOC395551/INHBA/SMAD3/WNT4/HMGB1/APCDD1	47
	GO:0045087	BP	GO:0045087	innate immune response	14/210	52/2090	0.000382522	0.0146631	0.012836	BTK/VAMP7/REL/TLR2/IFNG/PRDX1/SLC11A1/FYN/SYK/FGR/LOC395551/TLR2A/HMGB1/EXFABP	14
	GO:1903131	BP	GO:1903131	mononuclear cell differentiation	11/210	35/2090	0.000384884	0.0146631	0.012836	LCK/STAT3/MAFB/CD40LG/BCL6/CEBPB/IFNG/SYK/GATA3/WNT4/HMGB1	11
	GO:0002285	BP	GO:0002285	lymphocyte activation involved in immune response	8/210	20/2090	0.0003947	0.0146791	0.01285	STAT3/CD40LG/BCL6/VAMP7/IFNG/SLC11A1/GATA3/HMGB1	8
	GO:0002764	BP	GO:0002764	immune response-regulating signaling pathway	9/210	25/2090	0.000428559	0.0155676	0.0136278	PIK3AP1/CD28/TLR2/FYN/SYK/GATA3/TLR2A/HMGB1/LAT2	9
	GO:0001817	BP	GO:0001817	regulation of cytokine production	15/210	59/2090	0.000466912	0.0165044	0.0144479	STAT3/CD40LG/BCL6/IL18/CEBPB/TLR2/IFNG/SLC11A1/NFKB1/ADORA2B/GATA3/FGR/TLR2A/SMAD3/HMGB1	15
	GO:0032946	BP	GO:0032946	positive regulation of mononuclear cell proliferation	7/210	16/2090	0.000486045	0.0165044	0.0144479	CD40LG/BCL6/IL18/CD28/MSH6/SYK/HMGB1	7
	GO:0050671	BP	GO:0050671	positive regulation of lymphocyte proliferation	7/210	16/2090	0.000486045	0.0165044	0.0144479	CD40LG/BCL6/IL18/CD28/MSH6/SYK/HMGB1	7
	GO:0031347	BP	GO:0031347	regulation of defense response	11/210	36/2090	0.000506022	0.016557	0.0144939	PIK3AP1/BCL6/VAMP7/CEBPB/IFNG/NFKB1/ADORA2B/GATA3/FGR/SMAD3/HMGB1	11
	GO:0002286	BP	GO:0002286	T cell activation involved in immune response	6/210	12/2090	0.000527836	0.016557	0.0144939	STAT3/BCL6/IFNG/SLC11A1/GATA3/HMGB1	6
	GO:0031056	BP	GO:0031056	regulation of histone modification	6/210	12/2090	0.000527836	0.016557	0.0144939	TADA2A/GATA2/SMARCB1/CEBPB/GATA3/H2AFY	6
	GO:0023051	BP	GO:0023051	regulation of signaling	47/210	298/2090	0.000529994	0.016557	0.0144939	LCK/EYA3/CISH/STAT3/SFRP1/TNFAIP8L1/DRAXIN/DUPD1/AATF/ARHGEF3/PIK3AP1/GATA2/SMARCB1/BCL6/TAOK3/VAMP7/ARHGAP19/CHP1/PDCD4/CAPN3/IFNG/PRDX1/EPGN/NFKB1/BID/FAM65B/OPTN/ADORA2B/SYK/P2RY8/P2RY6/RGS20/PIK3R5/SOCS3/FEM1B/DNAJC27/THOC5/GATA3/CSF3/TGFB1/FGR/LOC395551/INHBA/SMAD3/WNT4/HMGB1/APCDD1	47
	GO:0030098	BP	GO:0030098	lymphocyte differentiation	10/210	31/2090	0.000565147	0.017309	0.0151522	LCK/STAT3/MAFB/CD40LG/BCL6/IFNG/SYK/GATA3/WNT4/HMGB1	10
	GO:0002697	BP	GO:0002697	regulation of immune effector process	9/210	26/2090	0.000599063	0.0179949	0.0157527	CD40LG/BCL6/VAMP7/IFNG/ADORA2B/SYK/GATA3/FGR/HMGB1	9
	GO:0051251	BP	GO:0051251	positive regulation of lymphocyte activation	10/210	32/2090	0.000750927	0.0214862	0.018809	LCK/CD40LG/BCL6/IL18/CD28/MSH6/IFNG/SYK/GATA3/HMGB1	10
	GO:0070661	BP	GO:0070661	leukocyte proliferation	10/210	32/2090	0.000750927	0.0214862	0.018809	CD40LG/BCL6/IL18/CEBPB/CD28/MSH6/SLC11A1/SYK/WNT4/HMGB1	10
	GO:0042098	BP	GO:0042098	T cell proliferation	7/210	17/2090	0.000756558	0.0214862	0.018809	CD40LG/CEBPB/CD28/SLC11A1/SYK/WNT4/HMGB1	7
	GO:0007159	BP	GO:0007159	leukocyte cell-cell adhesion	9/210	27/2090	0.000821363	0.0221201	0.0193639	LCK/CD40LG/CEBPB/CD28/IFNG/FAM65B/SYK/GATA3/HMGB1	9
	GO:0050727	BP	GO:0050727	regulation of inflammatory response	9/210	27/2090	0.000821363	0.0221201	0.0193639	PIK3AP1/BCL6/VAMP7/CEBPB/IFNG/NFKB1/ADORA2B/GATA3/SMAD3	9
	GO:1903037	BP	GO:1903037	regulation of leukocyte cell-cell adhesion	9/210	27/2090	0.000821363	0.0221201	0.0193639	LCK/CD40LG/CEBPB/CD28/IFNG/FAM65B/SYK/GATA3/HMGB1	9
	GO:0050778	BP	GO:0050778	positive regulation of immune response	11/210	38/2090	0.000844964	0.0223701	0.0195827	VAMP7/CD28/IFNG/SLC11A1/ADORA2B/FYN/SYK/GATA3/FGR/HMGB1/LAT2	11
	GO:0006915	BP	GO:0006915	apoptotic process	29/210	161/2090	0.000888719	0.0230152	0.0201474	LCK/EYA3/RHOT2/TOP2A/TNFAIP8L1/DRAXIN/SHISA5/AATF/GATA2/CD40LG/BCL6/REL/CEBPB/MSH6/CAPN3/IFNG/BID/NAIF1/TNFAIP8/SOCS3/FEM1B/SIGMAR1/GATA3/INHBA/SMAD3/ANP32B/WNT4/HMGB1/EXFABP	29
	GO:0046631	BP	GO:0046631	alpha-beta T cell activation	6/210	13/2090	0.0008988	0.0230152	0.0201474	STAT3/IL18/IFNG/SYK/GATA3/HMGB1	6
	GO:0048584	BP	GO:0048584	positive regulation of response to stimulus	32/210	185/2090	0.000987172	0.0245284	0.0214721	LCK/EYA3/STAT3/ARHGEF3/PIK3AP1/SMARCB1/TAOK3/VAMP7/CEBPB/CD28/IFNG/EPGN/FAM175A/SLC11A1/NFKB1/BID/FAM65B/ADORA2B/FYN/SYK/P2RY8/P2RY6/PIK3R5/DNAJC27/GATA3/CSF3/TGFB1/FGR/LOC395551/INHBA/HMGB1/LAT2	32
	GO:0001816	BP	GO:0001816	cytokine production	15/210	63/2090	0.000989303	0.0245284	0.0214721	STAT3/CD40LG/BCL6/IL18/CEBPB/TLR2/IFNG/SLC11A1/NFKB1/ADORA2B/GATA3/FGR/TLR2A/SMAD3/HMGB1	15
	GO:0070665	BP	GO:0070665	positive regulation of leukocyte proliferation	7/210	18/2090	0.00113368	0.0274146	0.0239987	CD40LG/BCL6/IL18/CD28/MSH6/SYK/HMGB1	7
	GO:0030217	BP	GO:0030217	T cell differentiation	8/210	23/2090	0.00117592	0.0274146	0.0239987	LCK/STAT3/MAFB/BCL6/IFNG/GATA3/WNT4/HMGB1	8
	GO:0032944	BP	GO:0032944	regulation of mononuclear cell proliferation	8/210	23/2090	0.00117592	0.0274146	0.0239987	CD40LG/BCL6/IL18/CEBPB/CD28/MSH6/SYK/HMGB1	8
	GO:0050670	BP	GO:0050670	regulation of lymphocyte proliferation	8/210	23/2090	0.00117592	0.0274146	0.0239987	CD40LG/BCL6/IL18/CEBPB/CD28/MSH6/SYK/HMGB1	8
	GO:0002761	BP	GO:0002761	regulation of myeloid leukocyte differentiation	5/210	10/2090	0.00161523	0.0360427	0.0315516	MAFB/GATA2/CEBPB/IFNG/TGFB1	5
	GO:0031349	BP	GO:0031349	positive regulation of defense response	5/210	10/2090	0.00161523	0.0360427	0.0315516	VAMP7/CEBPB/IFNG/ADORA2B/HMGB1	5
	GO:0035710	BP	GO:0035710	CD4-positive, alpha-beta T cell activation	5/210	10/2090	0.00161523	0.0360427	0.0315516	STAT3/IL18/IFNG/GATA3/HMGB1	5
	GO:0030099	BP	GO:0030099	myeloid cell differentiation	11/210	42/2090	0.00209063	0.0459938	0.0402628	STAT3/MAFB/GATA2/BCL6/CEBPB/IFNG/GATA3/CSF3/TGFB1/INHBA/HMGB1	11
	GO:0002237	BP	GO:0002237	response to molecule of bacterial origin	7/210	20/2090	0.00231663	0.0497333	0.0435364	CEBPB/TLR2/SLC11A1/NFKB1/TLR2A/HMGB1/EXFABP	7
	GO:0080134	BP	GO:0080134	regulation of response to stress	20/210	103/2090	0.00233046	0.0497333	0.0435364	EYA3/PIK3AP1/BCL6/TAOK3/VAMP7/CEBPB/PDCD4/IFNG/PRDX1/FAM175A/NFKB1/ADORA2B/FEM1B/THOC5/GATA3/FGR/SMAD3/H2AFY/WNT4/HMGB1	20
	GO:0030097	BP	GO:0030097	hemopoiesis	16/210	75/2090	0.00235613	0.0497333	0.0435364	LCK/STAT3/MAFB/GATA2/CD40LG/BCL6/CEBPB/IFNG/SYK/SBDS/GATA3/CSF3/TGFB1/INHBA/WNT4/HMGB1	16
		ID	Description	GeneRatio	BgRatio	pvalue	p.adjust	qvalue	geneID	Count
	gga04060	gga04060	Cytokine-cytokine receptor interaction	65/575	202/5041	5.53065e-16	7.96413e-14	7.33538e-14	TNFRSF18/CSF3R/CCL1/CCL20/FASLG/GDF3/BMP15/IL2RG/CSF1R/IL21R/IL16/CD40LG/CSF2/CD40/IL1RAP/CXCR5/IL18/IFNG/IL22/IL8L1/XCR1/IL2RB/IL7R/IL20RA/CD4/IL17F/IL17A/CSF2RA/TNFRSF21/IL18RAP/TNFSF13B/TNFRSF13C/IL13RA2/CSF2RB/TNFSF11/IL1B/IFNAR1/IL6R/CSF3/TGFB1/IL10RA/LOC395551/IL17RA/TNFRSF1B/CCL4/INHBA/IL4R/ACVRL1/CCR7/IL12RB1/CXCR1/CCR5/CCR8/TNFRSF1A/TNFRSF8/IL18R1/IL2RA/CCL5/LOC100857191/IL1R2/CRCBL/TNFR…	65
	gga04672	gga04672	Intestinal immune network for IgA production	18/575	38/5041	3.08128e-08	2.21852e-06	2.04337e-06	BLB1/DMA/MAP3K14/CD40LG/CD40/ICOS/CD28/CD86/CD88/TNFSF13B/TNFRSF13C/MADCAM1/TGFB1/DMB2/ITGA4/LOC770074/LOC107049666/BLA	18
	gga04620	gga04620	Toll-like receptor signaling pathway	22/575	84/5041	0.00012078	0.00568438	0.00523561	PIK3CD/PIK3R2/TLR4/CD40/MAP3K8/TLR2/IL8L1/NFKB1/IKBKE/CD86/CD88/TLR7/TLR1A/TLR1B/IL1B/IFNAR1/LOC395551/CCL4/TLR2A/IRF5/MAP2K3/CCL5	22
	gga04514	gga04514	Cell adhesion molecules	29/575	127/5041	0.000157899	0.00568438	0.00523561	BLB1/DMA/PTPRC/NTNG2/CD40LG/CD40/ITGB2/ICOS/CTLA4/CD28/CD226/CD86/CD4/CADM1/VTCN1/CD274/CD88/CD8BP/MADCAM1/VSIR/DMB2/CD8A/ITGA4/CD6/PDCD1/LOC770074/LOC107049666/BLA/CD2	29
	gga04625	gga04625	C-type lectin receptor signaling pathway	22/575	87/5041	0.000210428	0.00606031	0.00558187	MAP3K14/MAPKAPK2/CARD9/PIK3CD/PIK3R2/NFKB2/KSR1/LSP1P1/ARHGEF12/NFATC2/PLK3/NFKB1/IKBKE/SYK/NRAS/PCASP2/IL1B/LOC419429/EGR3/PCASP3/LOC420294/FCER1G	22
	gga04142	gga04142	Lysosome	26/575	122/5041	0.00104682	0.0251236	0.0231401	CTSS/AP3D1/ATP6V0D1/GUSB/PPT1/ARSG/LOC420160/GGA2/LIPA/CTSD/CTSZ/SUMF1/NPC2/SLC11A1/CTSV/LAPTM4A/AP1S2/CLN5/CTSC/DNASE2B/CTSB/M6PR/WDR7/CTSH/TCIRG1/LAPTM5	26
	gga04145	gga04145	Phagosome	28/575	138/5041	0.00151685	0.0297757	0.027425	BLB1/DMA/ITGB3/TUB4A/RAB7B/CTSS/NCF1C/ATP6V0D1/LOC420160/NCF2/TLR4/HGS/ITGB2/TLR2/PLA2R1/TUBA4AL/CTSV/C1R/ITGA2/CYBB/TLR1A/C3/M6PR/TLR2A/TCIRG1/NCF4/DMB2/BLA	28
	gga05168	gga05168	Herpes simplex virus 1 infection	30/575	152/5041	0.0016542	0.0297757	0.027425	BLB1/DMA/ITGB3/CARD9/PIK3CD/FASLG/PIK3R2/CD74/ALYREF/TLR2/TRAF5/IFNG/JAK1/NFKB1/BID/IKBKE/SYK/SOCS3/IL1B/C3/IFNAR1/TLR2A/LOC419429/ZNF767/DMB2/TNFRSF1A/PPP1CA/TRAF2/CCL5/BLA	30
		ONTOLOGY	ID	Description	GeneRatio	BgRatio	pvalue	p.adjust	qvalue	geneID	Count
Yellow	GO:0005840	CC	GO:0005840	ribosome	13/208	35/2158	9.3105e-06	0.00226245	0.00211691	RACK1/RPS17/RPL27/RPS4Y1/MRPL37/RPL15/RPL37A/RPS12/RPLP0/RPLP1/RPL35/RPS27A/EIF3H	13
	GO:0005829	CC	GO:0005829	cytosol	51/208	323/2158	9.203e-05	0.0111816	0.0104624	RACK1/PRNP/LIMK1/RPS17/TRAPPC3/TLN1/RPL27/CHUK/ATIC/ANXA2/SRC/STX10/PGGHG/MAD2L2/RPS4Y1/RAF1/GID8/NSFL1C/SH2D6/CLP1/DCUN1D1/MDH1/ACTB/HPGDS/RPL15/NGLY1/WASHC1/CYB5A/RPS12/ENO2/YES1/CDH2/ALDH1A1/MYO6/EIF2S3/RPLP0/ALDOC/TGM2/ADH1C/RPLP1/KIF18B/EEF2/KATNB1/RPL35/RPS27A/RARA/STXBP1/EIF3H/STUB1/UGDH/VPS53	51
	GO:0022626	CC	GO:0022626	cytosolic ribosome	9/208	23/2158	0.000148727	0.0120469	0.0112719	RPS17/RPL27/RPS4Y1/RPL15/RPS12/RPLP0/RPLP1/RPL35/RPS27A	9
	GO:0044391	CC	GO:0044391	ribosomal subunit	10/208	29/2158	0.000216787	0.0131698	0.0123226	RPS17/RPL27/RPS4Y1/MRPL37/RPL15/RPS12/RPLP0/RPLP1/RPL35/RPS27A	10
	GO:0003735	MF	GO:0003735	structural constituent of ribosome	11/194	29/1927	5.5399e-05	0.0149023	0.0142871	RPS17/RPL27/RPS4Y1/MRPL37/RPL15/RPL37A/RPS12/RPLP0/RPLP1/RPL35/RPS27A	11
		ID	Description	GeneRatio	BgRatio	pvalue	p.adjust	qvalue	geneID	Count
	gga03010	gga03010	Ribosome	31/515	121/5041	7.87602e-07	0.000115777	0.00011441	RPS17/RPL10A/RPS10/RPL27/RPL23A/RPS4Y1/RPS2/MRPL28/RPL12/RPS3A/MRPL1/RPL15/RPL37A/MRPL18/RPS12/MRPL10/RPS20/RPL24/RPL8/RPS3/RPLP0/MRPS2/RPL11/RPLP1/RPLP2/FAU/RPL35/RPS27A/MRPL13/MRPL9/RPL18A	31
	gga00040	gga00040	Pentose and glucuronate interconversions	9/515	22/5041	0.000166085	0.0122073	0.012063	LOC425137/LOC772271/XYLB/UGP2/UGT2A1/CRYL1/UGDH/RPEL1/AKR1E2	9
