# Supplementary material for: Gene Co-Expression Network Analysis Reveals the Hub Genes and Key Pathways Associated with Resistance to Salmonella Enteritidis Colonization in Chicken
Source: Int J Mol Sci. 2023 Mar 2;24(5):4824. doi: 10.3390/ijms24054824 (PMC10003191; doi:10.3390/ijms24054824)
Supplement: Supplementary file 1 [file ijms-24-04824-s001.zip › Supplementary Table S6.xlsx]

## Sheet: Dpi|BW|PA|VA
Dpi	BW	PA	VA	Dpi|BW	Dpi|PA	Dpi|VA	BW|VA	PA|VA	Dpi|BW|PA	Dpi|BW|VA	Dpi|PA|VA	Dpi|BW|PA|VA
ENSGALG00000016267	ENSGALG00000048303	ENSGALG00000045555	ENSGALG00000004455	ENSGALG00000041114	ENSGALG00000016289	ENSGALG00000016510	ENSGALG00000031940	ENSGALG00000009683	ENSGALG00000005521	ENSGALG00000016451	ENSGALG00000050615	ENSGALG00000005894
ENSGALG00000015538	ENSGALG00000008507	ENSGALG00000047077	ENSGALG00000004236	ENSGALG00000047009	ENSGALG00000032061	ENSGALG00000047515	ENSGALG00000007619	ENSGALG00000003876	ENSGALT00000103517	ENSGALG00000028119	ENSGALG00000002286	ENSGALG00000027608
ENSGALG00000008163	ENSGALG00000011557	ENSGALG00000015033	ENSGALG00000042411	ENSGALG00000010091	ENSGALG00000047273		ENSGALG00000033204	ENSGALG00000026542	ENSGALG00000029691	ENSGALT00000102029	ENSGALG00000008670	ENSGALG00000002172
ENSGALG00000038657	ENSGALG00000002003	ENSGALG00000004165	ENSGALG00000041680	ENSGALG00000037186			ENSGALG00000006246	ENSGALT00000091511		ENSGALG00000006350	ENSGALG00000004294	ENSGALG00000013210
ENSGALG00000009483	ENSGALG00000023541	ENSGALG00000006561	ENSGALG00000026470	ENSGALG00000023725			ENSGALG00000043628	ENSGALT00000104629		ENSGALG00000050948	ENSGALG00000003628	ENSGALG00000004998
ENSGALG00000013952	ENSGALG00000013639	ENSGALG00000029419	ENSGALG00000008493	ENSGALG00000052202				ENSGALT00000105958			ENSGALG00000004930	ENSGALG00000005506
ENSGALG00000013138	ENSGALG00000002841	ENSGALG00000037325	ENSGALT00000028556					ENSGALG00000043283			ENSGALG00000004695	ENSGALT00000092369
ENSGALG00000002639	ENSGALG00000002897	ENSGALG00000032145	ENSGALG00000015833					ENSGALG00000035854			ENSGALG00000030200	ENSGALG00000053041
ENSGALG00000012388	ENSGALG00000043591	ENSGALG00000037193	ENSGALT00000026860					ENSGALG00000054224			ENSGALG00000026492
ENSGALG00000015910	ENSGALG00000009177	ENSGALG00000010992	ENSGALG00000052840					ENSGALG00000017139			ENSGALG00000021686
ENSGALG00000014833	ENSGALG00000043148	ENSGALG00000039839	ENSGALG00000012555					ENSGALG00000004725			ENSGALG00000027561
ENSGALG00000048159	ENSGALG00000046843	ENSGALG00000010867	ENSGALG00000006421					ENSGALG00000027908			ENSGALG00000031797
ENSGALG00000040421	ENSGALG00000045352	ENSGALG00000007065	ENSGALG00000039101					ENSGALG00000028499			ENSGALG00000048205
ENSGALG00000011280		ENSGALG00000044674	ENSGALT00000056435								ENSGALG00000043126
ENSGALG00000041445		ENSGALG00000013762	ENSGALT00000106731
ENSGALG00000017196		ENSGALT00000102026	ENSGALG00000008007
ENSGALT00000092365		ENSGALT00000107877	ENSGALG00000031449
ENSGALG00000032335		ENSGALT00000053190	ENSGALT00000055208
ENSGALG00000030148		ENSGALG00000013697	ENSGALG00000050274
		ENSGALT00000095781	ENSGALG00000033641
		ENSGALG00000031122	ENSGALG00000054048
		ENSGALT00000106967	ENSGALG00000002431
		ENSGALG00000011982	ENSGALG00000026736
		ENSGALG00000016529	ENSGALG00000010049
		ENSGALG00000005195	ENSGALG00000034561
		ENSGALG00000010616	ENSGALG00000013244
		ENSGALG00000009152	ENSGALG00000008039
		ENSGALG00000006599	ENSGALG00000031493
		ENSGALG00000007299	ENSGALG00000013826
		ENSGALG00000014899	ENSGALG00000048151
		ENSGALG00000013569	ENSGALG00000030605
		ENSGALG00000049652	ENSGALG00000049774
		ENSGALG00000012342	ENSGALG00000028749
		ENSGALT00000103122
		ENSGALG00000029450
		ENSGALG00000026428
		ENSGALG00000042016
		ENSGALG00000002450
		ENSGALG00000004431

## Sheet: Dpi|SE|PA|VA
Dpi	SE	PA	VA	Dpi|SE	Dpi|PA	Dpi|VA	PA|VA	Dpi|SE|VA	Dpi|PA|VA	Dpi|SE|PA|VA
ENSGALG00000016267	ENSGALT00000098901	ENSGALG00000045555	ENSGALG00000004455	ENSGALG00000013138	ENSGALG00000005521	ENSGALG00000016451	ENSGALG00000009683	ENSGALG00000047515	ENSGALG00000005894	ENSGALG00000030200
ENSGALG00000041114	ENSGALT00000043939	ENSGALG00000047077	ENSGALG00000004236	ENSGALG00000012388	ENSGALT00000103517	ENSGALG00000028119	ENSGALG00000003876		ENSGALG00000027608	ENSGALG00000026492
ENSGALG00000015538	ENSGALG00000040802	ENSGALG00000015033	ENSGALG00000042411	ENSGALG00000015910	ENSGALG00000016289	ENSGALG00000016510	ENSGALG00000026542		ENSGALG00000050615	ENSGALG00000021686
ENSGALG00000047009	ENSGALG00000007596	ENSGALG00000004165	ENSGALG00000041680	ENSGALG00000048159	ENSGALG00000029691	ENSGALT00000102029	ENSGALT00000091511		ENSGALG00000002286	ENSGALG00000048205
ENSGALG00000008163	ENSGALG00000040718	ENSGALG00000006561	ENSGALG00000026470		ENSGALG00000032061	ENSGALG00000006350	ENSGALT00000104629		ENSGALG00000008670
ENSGALG00000010091	ENSGALT00000099034	ENSGALG00000029419	ENSGALG00000031940		ENSGALG00000047273	ENSGALG00000050948	ENSGALT00000105958		ENSGALG00000004294
ENSGALG00000038657	ENSGALG00000027872	ENSGALG00000037325	ENSGALG00000033204				ENSGALG00000043283		ENSGALG00000003628
ENSGALG00000037186	ENSGALG00000023415	ENSGALG00000032145	ENSGALG00000007619				ENSGALG00000035854		ENSGALG00000004930
ENSGALG00000009483	ENSGALG00000052643	ENSGALG00000037193	ENSGALG00000008493				ENSGALG00000054224		ENSGALG00000004695
ENSGALG00000013952	ENSGALT00000091149	ENSGALG00000010992	ENSGALT00000028556				ENSGALG00000017139		ENSGALG00000027561
ENSGALG00000002639	ENSGALG00000050785	ENSGALG00000039839	ENSGALG00000015833				ENSGALG00000004725		ENSGALG00000031797
ENSGALG00000014833	ENSGALT00000094190	ENSGALG00000010867	ENSGALT00000026860				ENSGALG00000027908		ENSGALG00000002172
ENSGALG00000040421	ENSGALG00000050054	ENSGALG00000007065	ENSGALG00000052840				ENSGALG00000028499		ENSGALG00000013210
ENSGALG00000011280	ENSGALT00000042421	ENSGALG00000044674	ENSGALG00000012555						ENSGALG00000004998
ENSGALG00000041445	ENSGALG00000039822	ENSGALG00000013762	ENSGALG00000006421						ENSGALG00000005506
ENSGALG00000017196	ENSGALG00000049672	ENSGALT00000102026	ENSGALG00000039101						ENSGALT00000092369
ENSGALT00000092365	ENSGALG00000049917	ENSGALT00000107877	ENSGALT00000056435						ENSGALG00000053041
ENSGALG00000023725	ENSGALG00000012470	ENSGALT00000053190	ENSGALT00000106731						ENSGALG00000043126
ENSGALG00000032335	ENSGALT00000107330	ENSGALG00000013697	ENSGALG00000008007
ENSGALG00000052202	ENSGALT00000104655	ENSGALT00000095781	ENSGALG00000031449
ENSGALG00000030148	ENSGALG00000001252	ENSGALG00000031122	ENSGALT00000055208
	ENSGALG00000045581	ENSGALT00000106967	ENSGALG00000050274
	ENSGALG00000029381	ENSGALG00000011982	ENSGALG00000033641
	ENSGALG00000031164	ENSGALG00000016529	ENSGALG00000054048
	ENSGALG00000007645	ENSGALG00000005195	ENSGALG00000002431
	ENSGALG00000007018	ENSGALG00000010616	ENSGALG00000026736
	ENSGALG00000053964	ENSGALG00000009152	ENSGALG00000010049
	ENSGALG00000015677	ENSGALG00000006599	ENSGALG00000034561
	ENSGALG00000033300	ENSGALG00000007299	ENSGALG00000013244
	ENSGALG00000032149	ENSGALG00000014899	ENSGALG00000008039
	ENSGALG00000013033	ENSGALG00000013569	ENSGALG00000031493
	ENSGALG00000007804	ENSGALG00000049652	ENSGALG00000013826
	ENSGALG00000010283	ENSGALG00000012342	ENSGALG00000048151
	ENSGALG00000004203	ENSGALT00000103122	ENSGALG00000030605
	ENSGALG00000049669	ENSGALG00000029450	ENSGALG00000043628
	ENSGALT00000103946	ENSGALG00000026428	ENSGALG00000006246
	ENSGALG00000005843	ENSGALG00000042016	ENSGALG00000049774
	ENSGALG00000041977	ENSGALG00000002450	ENSGALG00000028749
	ENSGALG00000002860	ENSGALG00000004431
	ENSGALG00000015970
	ENSGALG00000006633
	ENSGALT00000084346
	ENSGALG00000049966
	ENSGALG00000032713
	ENSGALG00000026744
	ENSGALG00000033807
	ENSGALT00000107343
	ENSGALG00000037709
	ENSGALG00000030261
	ENSGALG00000054784
	ENSGALG00000040756
	ENSGALG00000002739
	ENSGALG00000004881
	ENSGALG00000008549
	ENSGALG00000053997
	ENSGALG00000003532
	ENSGALG00000001803
	ENSGALG00000017079
	ENSGALG00000006925
	ENSGALG00000021213
	ENSGALG00000004112
	ENSGALG00000051392
	ENSGALG00000047357
	ENSGALG00000037480
	ENSGALG00000010642
	ENSGALG00000047514
	ENSGALG00000003920
	ENSGALG00000026957
	ENSGALT00000001354
	ENSGALG00000011937
	ENSGALG00000025884
	ENSGALG00000009322
	ENSGALG00000007494
	ENSGALG00000010565
	ENSGALG00000006356
	ENSGALG00000039575
	ENSGALG00000045726
	ENSGALG00000033889
	ENSGALG00000023682
	ENSGALG00000031699
	ENSGALG00000036539
	ENSGALG00000031794
	ENSGALG00000016927
	ENSGALG00000041078
	ENSGALG00000007527
	ENSGALG00000014868
	ENSGALG00000010737
	ENSGALG00000002632
	ENSGALG00000043256
	ENSGALG00000004812
	ENSGALG00000052368

## Sheet: BW|Bac|PA|VA
BW	Bac	PA	VA	BW|Bac	BW|PA	BW|VA	Bac|PA	Bac|VA	PA|VA	BW|Bac|VA	BW|PA|VA	Bac|PA|VA	BW|Bac|PA|VA
ENSGALG00000041114	ENSGALG00000004065	ENSGALG00000045555	ENSGALG00000004455	ENSGALG00000048303	ENSGALT00000103517	ENSGALG00000016451	ENSGALT00000107877	ENSGALT00000026860	ENSGALG00000009683	ENSGALG00000031940	ENSGALG00000005894	ENSGALG00000035854	ENSGALG00000027608
ENSGALG00000047009	ENSGALG00000009433	ENSGALG00000047077	ENSGALG00000004236	ENSGALG00000043591	ENSGALG00000005521	ENSGALG00000028119	ENSGALT00000102026		ENSGALG00000003876	ENSGALT00000102029	ENSGALG00000013210	ENSGALT00000091511	ENSGALG00000004998
ENSGALG00000008507	ENSGALT00000061765	ENSGALG00000016289	ENSGALG00000042411	ENSGALG00000052202	ENSGALG00000029691	ENSGALG00000007619			ENSGALG00000026542		ENSGALG00000053041		ENSGALG00000002172
ENSGALG00000011557	ENSGALT00000019144	ENSGALG00000015033	ENSGALG00000041680			ENSGALG00000033204			ENSGALG00000008670				ENSGALG00000005506
ENSGALG00000002003	ENSGALG00000033304	ENSGALG00000004165	ENSGALG00000026470			ENSGALG00000006350			ENSGALG00000050615				ENSGALT00000092369
ENSGALG00000010091	ENSGALG00000036850	ENSGALG00000006561	ENSGALG00000016510			ENSGALG00000006246			ENSGALG00000002286
ENSGALG00000037186	ENSGALG00000000596	ENSGALG00000029419	ENSGALG00000008493			ENSGALG00000050948			ENSGALT00000104629
ENSGALG00000023541	ENSGALG00000014936	ENSGALG00000037325	ENSGALT00000028556			ENSGALG00000043628			ENSGALT00000105958
ENSGALG00000013639	ENSGALT00000041931	ENSGALG00000032145	ENSGALG00000015833						ENSGALG00000043283
ENSGALG00000002841	ENSGALT00000096359	ENSGALG00000037193	ENSGALG00000052840						ENSGALG00000054224
ENSGALG00000002897	ENSGALG00000037601	ENSGALG00000010992	ENSGALG00000012555						ENSGALG00000003628
ENSGALG00000009177	ENSGALG00000040877	ENSGALG00000039839	ENSGALG00000006421						ENSGALG00000004695
ENSGALG00000043148	ENSGALG00000029260	ENSGALG00000010867	ENSGALG00000039101						ENSGALG00000004930
ENSGALG00000046843	ENSGALG00000016516	ENSGALG00000007065	ENSGALT00000056435						ENSGALG00000004294
ENSGALG00000045352	ENSGALG00000028204	ENSGALG00000044674	ENSGALT00000106731						ENSGALG00000048205
ENSGALG00000023725	ENSGALG00000052326	ENSGALG00000013762	ENSGALG00000008007						ENSGALG00000026492
	ENSGALG00000011335	ENSGALT00000053190	ENSGALG00000031449						ENSGALG00000021686
	ENSGALG00000045350	ENSGALG00000013697	ENSGALT00000055208						ENSGALG00000030200
	ENSGALG00000004115	ENSGALT00000095781	ENSGALG00000050274						ENSGALG00000031797
	ENSGALG00000010428	ENSGALG00000031122	ENSGALG00000033641						ENSGALG00000027561
	ENSGALG00000010719	ENSGALT00000106967	ENSGALG00000054048						ENSGALG00000017139
	ENSGALG00000014280	ENSGALG00000011982	ENSGALG00000002431						ENSGALG00000004725
	ENSGALG00000003958	ENSGALG00000016529	ENSGALG00000026736						ENSGALG00000027908
	ENSGALG00000015405	ENSGALG00000005195	ENSGALG00000010049						ENSGALG00000028499
	ENSGALG00000008738	ENSGALG00000010616	ENSGALG00000034561						ENSGALG00000043126
	ENSGALG00000006356	ENSGALG00000009152	ENSGALG00000013244
	ENSGALG00000016283	ENSGALG00000006599	ENSGALG00000047515
	ENSGALG00000004112	ENSGALG00000007299	ENSGALG00000008039
	ENSGALG00000009815	ENSGALG00000032061	ENSGALG00000031493
	ENSGALG00000037480	ENSGALG00000014899	ENSGALG00000013826
	ENSGALG00000043694	ENSGALG00000013569	ENSGALG00000048151
	ENSGALG00000011543	ENSGALG00000049652	ENSGALG00000030605
	ENSGALG00000004079	ENSGALG00000012342	ENSGALG00000049774
	ENSGALG00000002448	ENSGALT00000103122	ENSGALG00000028749
	ENSGALG00000047956	ENSGALG00000029450
	ENSGALG00000002147	ENSGALG00000026428
	ENSGALG00000001848	ENSGALG00000042016
	ENSGALT00000043395	ENSGALG00000047273
	ENSGALT00000098718	ENSGALG00000002450
	ENSGALG00000029724	ENSGALG00000004431
	ENSGALG00000048543
	ENSGALT00000009581
	ENSGALT00000075445
	ENSGALT00000044602
	ENSGALG00000005938
	ENSGALG00000009719
	ENSGALT00000106142
	ENSGALG00000016500
	ENSGALT00000093743
	ENSGALG00000053405
	ENSGALG00000011287
	ENSGALG00000051072
	ENSGALT00000099369
	ENSGALG00000031832
	ENSGALG00000040421
	ENSGALG00000028407
	ENSGALG00000015813
	ENSGALG00000011393
	ENSGALG00000030305
	ENSGALG00000020582
	ENSGALG00000052506
	ENSGALG00000044464
	ENSGALG00000015190
	ENSGALG00000035499
	ENSGALG00000032335
