# Supplementary material for: Gene Co-Expression Network Analysis Reveals the Hub Genes and Key Pathways Associated with Resistance to Salmonella Enteritidis Colonization in Chicken
Source: Int J Mol Sci. 2023 Mar 2;24(5):4824. doi: 10.3390/ijms24054824 (PMC10003191; doi:10.3390/ijms24054824)
Supplement: Supplementary file 1 [file ijms-24-04824-s001.zip › Supplementary Table S7.xlsx]

## Sheet: Sheet1
Gene	Primer sequences
FAM168B	F: CGAAGTGCCTATCCACAGCA
	R: GGTGGTGGAATAGGAGCAGG
HESX1	F: GCTGGCTGAAGGTGAAACCA
	R: CACATCCATCCACGGTCTGT
PIGC	F: GCCCTTCCCCGATAACTACG
	R: CGTCCATGTACCACCAGGTT
EMC6	F: CCTGCACGGCTTCATCTTCT
	R: ATGAGCCCTCCCGTGAAAAG
NFU1	F: CTGGGCGGCCGGATTTG
	R: TGGGTTTGGTGTGTCCTGAG
FKBP5	F: CCTCCAATGCCACCCTCTTT
	R: CGTTGGGGTTGGAATAGCCT
S100A12	F: TTGGTGAAGTGATGCTCCTGA
	R: GGTTGTGCTGATGTTGGTGT
USP8	F: ATCACTCGCCAACGAACACT
	R: CCTCCTGAATGGCTTGGGTT
ACTB	F: GAGAAATTGTGCGTGACATCA
	R: CCTGAACCTCTCATTGCCA
